# Supplementary material for: Impacts of Regional-transported Biomass Burning Emissions on Chemical and Optical Properties of Carbonaceous Aerosols in Nanjing, East China
Source: Copernicus journal article supplement (doi:10.5194/acp-2018-1029), 2019-01-15
Supplement: Supplementary file [file acp-2018-1029-AC1-supplement.pdf]

RE: A point-to-point response to reviewers' comments

'Impacts of Regional-transported Biomass Burning Emissions on Chemical and Optical Properties of Carbonaceous Aerosols in Nanjing, East China' (acp-2018-1029) by Xiaoyan Liu, Yan-Lin Zhang, Yiran Peng, Lulu Xu, Chunmao Zhu, Xiaoyao Zhai, Chi Yang, Mozammel Haque, Fang Cao, Yunhua Chang, Tong Huang, Zufei Xu, Mengying Bao, Wenqi Zhang, Meiyi Fan, Xuhui Lee

We are grateful to the helpful comments by the referees, and have carefully revised our manuscript accordingly. A point-to-point response to the reviewers' comments is given below, in which comments are repeated in italic; the citations from the revised manuscript are underlined; the revised or added statements are highlighted in yellow. The revised manuscript copy is attached after the point-to-point response, in which the revised statements are highlighted in yellow.

Anonymous Referee #1

*This study investigates the chemical and optical properties of carbonaceous aerosols in Nanjing and finds that the transport of biomass burning emissions is a major source of carbonaceous aerosols. The paper is clear on describing the results they found, and the conclusion is solid. My largest concern is the way how the authors present the paper. From my understanding, the biomass burning emissions are transported to atmosphere in Nanjing and they showed different properties than other episodes, it is not the case that the transported emission changed the properties of aerosols emitted in Nanjing. Thus, I would avoid saying that the "Impacts of Regional-transported Biomass Burning Emissions on", which is misleading.*

Reply: We are grateful for the careful summary and kindly comments from the referee. According to the suggestion about the title, here's our reply:

In order to avoid being misleading, we would like to revise the title as 'Chemical and Optical Properties of Carbonaceous Aerosols in Nanjing, East China: Regional-transported Biomass Burning Contribution'.

We agree with the reviewer in the sense that aerosols collected in situ observations are affected by both local emissions and from regional transported emissions such as during biomass burning episodes. This

study dedicated to figure out the role of regional transported biomass burning emissions in the pollution episode and it turned out that the chemical and optical properties of ambient aerosols in Nanjing was influenced by regional-transported biomass burning emissions during the episode because of the mixing of aerosols with diverse origins. In such a sense, we put ‘aerosols in Nanjing’ which directs general ambient aerosols in Nanjing atmosphere, instead of ‘aerosols from local emissions of Nanjing’.

Detailed points:

1. *Page 1: Abstract: “Biomass burning can significantly impact the chemical and optical properties of carbonaceous aerosol”, this sentence is repeating with the next one.*

Reply: As suggested, we removed the duplicated expressions and revised the description in Abstract as ‘Biomass burning can significantly impact the chemical and optical properties of carbonaceous aerosols. Here, the biomass burning impacts were studied during wintertime in a megacity of Nanjing, East China.’ (Page 1 line 20-21).

The original sentences were ‘Biomass burning can significantly impact the chemical and optical properties of carbonaceous aerosols. Here, the impacts of biomass burning emissions on chemical and optical properties of carbonaceous aerosols were studied during wintertime in a megacity of Nanjing, East China.’

2. *Page 2, Lines 5-6, please avoid repeating such blurry information.*

Reply: As suggested, we deleted the original sentence ‘The regional transported biomass burning emissions may significantly impact the chemical and optical properties of carbonaceous aerosols in the polluted atmosphere’, which indefinitely attributed the impacts of aerosols chemical and optical property to transported biomass burning emissions.

3. *Page 2, Lines 21: long-range transport of aerosols; “simulation modeling”?*

Reply: As stated in the original manuscript, the impacts due to biomass burning are regional and global owing to the aerosols long-range transport as ‘All effects mentioned above are both regional and global owing to the aerosols long-range transport (Page 2 line 21-22)’. In order to figure out the role long-range

transport playing in the aerosol pollution events, numerical simulations were applied in previous studies, such as the references mentioned in our revised manuscript that ‘Studies based on numerical simulations have shown that emissions from biomass burning can be transported to remote sites, even across the oceans (Aouizerats et al., 2015; Zhu et al., 2016; Ancellet et al., 2016)’ (Page 2 line 22-23). Additionally, a clear statement including more details about numerical simulations research cases were added in our revised manuscript as ‘Aouizerats et al. (2015) modeled a large fire-induced haze episode in 2006 stemming mostly from Indonesia using the Weather Research and Forecasting model coupled with chemistry (WRF-Chem) and found out the notable impact of long-range transported aerosols from Indonesia on ambient air quality and climate in Singapore. Ancellet et al. (2016) made the assessment of aerosol transport from North America to Europe using forward simulations of the FLEXPART Lagrangian particle dispersion model.’ (Page 2 line 23-27).

4. *Page 2, Lines 26: methods for biomass burning calculation*

Reply: The expression mistake has been corrected as suggested. The revised statements are ‘In the observation-based studies, the characteristic ratio calculation and positive matrix factorization (PMF) are the most frequently methods to calculate biomass burning contribution.’ (Page 2 line 29-31)’.

5. *Page 3, Line 20, POM?*

Reply: ‘POM’ has been replaced of its full name ‘primary organic matter’ (Page 3 line 24-25).

6. *Page 3, Line 21, This is no turning here to use “However”*

Reply: As suggested, ‘However’ has been replaced by ‘Meanwhile’ which better indicates the similar climatic effects between BC and BrC. helps to switch the emphasis from black carbon to brown carbon to further discuss the significant impact of brown carbon on radiative process. This paragraph is discussing the biomass burning aerosols impact on radiative forcing. Before the ‘Meanwhile’, it is describing the radiative forcing enhancement by black carbon, as ‘Biomass burning aerosol has significant impacts on regional and global radiative forcing (Ramanathan and Carmichael, 2008). There is no doubt that element carbon enhances solar absorption of ambient aerosols most effectively (Ramanathan and Carmichael, 2008;

Myhre and Samset, 2015; Li et al., 2016b). Lack et al. (2012) found that the absorptivity of BC and primary organic matter mixture has 70% enhancement in biomass burning period compared to normal days in Boulder, Colorado (Page 3 line 23-25)'. After the 'Meanwhile', it begins to emphasize the role brown carbon played in the light absorption which has attracted increasing attention recently, as 'Meanwhile, the role of BrC in the radiation balance of the climate system has attracted increasing interest. Shamjad et al. (2015) mentioned that the atmospheric radiative forcing of total aerosol increases by 56%, and the forcing of BrC aerosol increases by 38% in the biomass burning season comparing to other seasons in Kanpur, India. Light absorption characteristics of WSOC aerosols are key factors in the climate forcing calculation (Page 3 line 26-29)'.

7. *Page 4, Line 2, why WSOC contribute to EC?*

Reply: The radiative forcing of WSOC doesn't contribute to that of EC. To eliminate the ambiguity of original expressions, the statement has been revised as '...that the WSOC radiative forcing accounted for  $6.03 \pm 3.62\%$  and  $11.41 \pm 7.08\%$  of EC radiative forcing at two stations there, respectively (Page 4 line 6-7)'.

The original expressions were '...that the relative contributions of radiative forcing of WSOC to EC were  $6.03 \pm 3.62\%$  and  $11.41 \pm 7.08\%$  at two stations there.'

8. *Page 4, Line 4, what are MAC365 and AAE*

Reply:  $MAC_{365}$ , also named  $MAE_{365}$  is the mass absorption efficiency at 365 nm. MAE was explained as 'Mass absorption efficiency (MAE,  $m^2 g^{-1}$ ) of BrC in WSOC was derived from Eq. (2):

$$MAE = b_{abs}/WSOC, \quad (2)$$

where WSOC refers to the concentration of WSOC ( $\mu g m^{-3}$ ) (Page 6 line 23-26)' and 'Mass absorption efficiency characterizes the efficiency of light absorption by WSOC. (Page 12 line 33)'.

AAE is Absorption Angstrom exponents which was explained as 'Absorption Angstrom exponents (AAE) were computed by Eq. (3):

$$b_{abs} \approx K \cdot \lambda^{-AAE}, \quad (3)$$

where  $K$  is a constant,  $AAE$  describes the wavelength-dependent absorption enhancement of BrC, associated with its origin, size and composition (Bikkina, 2014); and  $\lambda$  is wavelength in the range of 310-460 nm. AAE

for WSOC was fitted within the range of 310-460 nm in which coefficients of determination ( $R^2$ ) for all samples are above 0.90 (Page 6 line 26-31)’ and ‘It is evident that the absorption coefficient of WSOC shows a relationship with wavelength, which can be described by absorption Angstrom exponent. AAE is also used to distinguish the BrC emission types due to its dependence on particle size and composition (Page 12 line 25-27)’.

In the original manuscript, MAC<sub>365</sub> and AAE in the Introduction were mentioned only as the examples of parameters related to the optical property, where the examples are not essential here. Furthermore, all of the relative optical parameters would be introduced in detail in latter statements mentioned above. Therefore, we removed these abbreviations in the introduction and revised the statements as ‘The afore-mentioned method provides a rough estimation on the absorption of solar energy by WSOC and EC, by using the measured sample concentrations of WSOC and EC and the optical properties of WSOC. Many assumptions were applied in that method, thus uncertainties in the estimated forcing could be substantial (Page 4 line 7-9).’

The original statements were ‘The afore-mentioned method provides a rough estimation on the absorption of solar energy by WSOC and EC, by using the measured sample concentrations of WSOC and EC and the optical properties of WSOC (MAC<sub>365</sub> and AAE). Many assumptions were applied in that method (e.g., MAC and AAE of EC being constant), thus uncertainties in the estimated forcing could be substantial.’

9. *Page 10, the equations to estimate the contributions of biomass burning to carbonaceous components are based on the emissions of biomass burning. It should be discussed about the uncertainties as the ambient concentrations measured in Nanjing are mixture of biomass burning transported to here and local emissions from other sources.*

Reply: As suggested, the illustration about mentioned uncertainties were added at Page 11 line 3-5, as ‘However, biomass burning contribution here could be related with both local emissions and long-range transport. The origins of biomass burning will be discussed in the following section.’ More detailed discussion about the origin of biomass burning being a mixture of local emissions and long-range transport are in section 3.5.2 (Page 12 line 1-10), as ‘In addition, there was a notable cluster originating from the coastal site of eastern China and mainly passing through Shanghai and Jiangsu, where no fire signals were found. But this cluster had a relatively high mean levoglucosan concentration (673 ng m<sup>-3</sup>). According to the research by Zhou et al. (2017) on the biomass burning emission inventory, domestic straw burning was responsible for ~42 % of total biomass burning in China in 2012, and ~1.5 Gg and ~80 Gg PM<sub>2.5</sub> came

from domestic burning in Shanghai and Jiangsu, respectively. It illustrated the significant impact of indoor biomass burning which was invisible in MODIS fire spots map. Therefore, the levoglucosan enrichment of the cluster from coastal area might be due to domestic biomass burning. The air mass frequency of this cluster was 32.5%, the largest one among that for all clusters, which means domestic biomass burning in the eastern China much influenced aerosols in Nanjing. Local domestic biomass burning should be taken as an important factor to study aerosols of eastern China in further study, even though open biomass burning from long-range transport played a significant role in this study.'

10. Page 11, the levoglucosan contraction could be as high as 673 ngm-3 from non-biomass burning regions, you cannot put all 796 ngm-3 from southeast China to biomass burning.

Reply: According to the revised statements in Page 12 line 7-10 'The air mass frequency of this cluster was 32.5%, the largest one among that for all clusters, which means domestic biomass burning in the eastern China much influenced aerosols in Nanjing. Local domestic biomass burning should be taken as an important factor to study aerosols of eastern China in further study, even though open biomass burning from long-range transport played a significant role in this study', indoor biomass burning which is invisible on MODIS fire spot map might result in the mean levoglucosan concentration of this cluster as high as 673 ng m<sup>-3</sup>, which is supported by previous literature. Accordingly, we cannot deny that it is biomass burning attributing to this cluster originated from east China. Correspondingly, it is reasonable to attribute all 796 ng m<sup>-3</sup> from southeast China to biomass burning.

11. Figure 10: from the relationship of OC, EC, and WSOC with lev, man, gal and nss-K in Figure 4, WSOC is correlated with biomass burning. Then, it is not clear why babs is not correlated with BB-WSOC at all (Figure 10), and it can not be explained by biomass burning is not the only source of BrC.

Reply: We revised Figure 10, presenting the correlation between babs and WSOC ( $R^2 = 0.76$ ,  $P < 0.01$ ) and the correlation between babs and WSOC from biomass burning, calculated with WSOC multiplied by BB-WSOC fraction ( $R^2 = 0.55$ ,  $P < 0.01$ ). Both correlations are significantly positive at 1% possibility level. But babs has a relatively higher  $R^2$  with WSOC than WSOC from BB, indicating that other sources also contribute to water-soluble BrC, such as secondary aerosols.

The relative statements were revised as ‘According to the analysis in Sect. 3.4, the robust correlations between WSOC and biomass burning tracers (levoglucosan, mannosan, galactosan or nss-K<sup>+</sup>) implied that biomass burning has contributed to WSOC. With respect to this point, the correlation between  $b_{\text{abs}}$  and WSOC ( $R^2 = 0.76$ ,  $P < 0.01$ ) and that between  $b_{\text{abs}}$  and WSOC from biomass burning, calculated with WSOC multiplied by BB-WSOC fraction ( $R^2 = 0.55$ ,  $P < 0.01$ ), are presented in Fig. 10. Both correlations are significantly positive at 1% possibility level. But  $b_{\text{abs}}$  has a relatively higher  $R^2$  with WSOC than WSOC from BB, indicating that other sources also contributed to water-soluble BrC in the episode. Other researchers pointed out that secondary photochemical reactions in the atmosphere can produce water-soluble BrC as well (Sareen et al., 2013;Liu et al., 2016). Other researchers pointed out that secondary photochemical reactions in the atmosphere can produce water-soluble BrC as well (Sareen et al., 2013;Liu et al., 2016) (Page 12 line 18-24)’

Attached is revised figure 10 (Page 32):

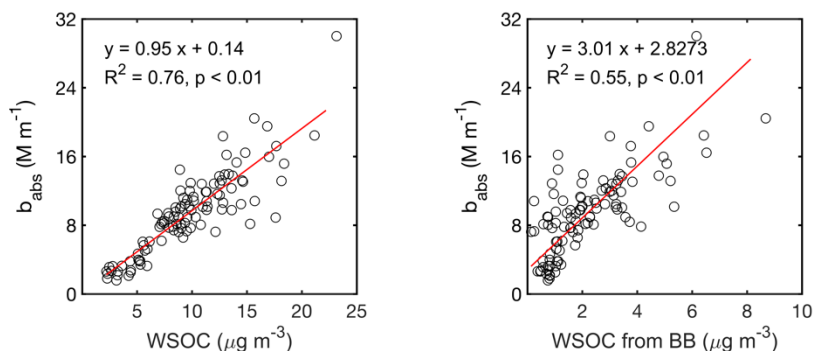

**Figure 10: Correlations of water-soluble BrC absorption coefficient ( $b_{\text{abs}}$ ) and WSOC or WSOC from biomass burning (WSOC from BB) in PM<sub>2.5</sub> from 14 to 29 Jan, 2015 in Nanjing. WSOC from BB is calculated with WSOC multiplied by BB-WSOC.**

*12. Contributions of biomass burning to carbonaceous aerosols are a key factor for analyzing their radiative effects. The authors should add these key information in abstract or conclusion.*

Reply: The description about biomass burning contributions to carbonaceous aerosols were added in abstract, as ‘The biomass burning contribution to WSOC and OC was in the range of 1.1-55.4 % and 0.2-

53.6 %, respectively. (Page 1 line 24-25)’. We also gave the relative information in the conclusion section (Page 14 line 15-16), stated as ‘Biomass burning contribution to OC and WSOC was, on average,  $20.9 \pm 9.3$  % and  $22.3 \pm 9.9$  %, respectively, and was as high as 53.6 % to OC and 55.4 % to WSOC’.

13. *Figure 8 is not in high quality, where is Nanjing? I can’t agree with the authors that it shows “the air masses were mainly coming from the south and southeast regions”.*

Reply: We are grateful to the reviewer for the comment. Taking the comment, we have remade Figure 8 in high resolution where Nanjing is clearly shown. The Flexpart simulation results indicated that the a notable fraction of air masses were coming from a region in the south and southeast of Nanjing. Accordingly, we have revised the sentence as “...the Flexpart potential emission sensitivity in Fig. 8 indicates that a notable fraction of air masses was coming from a region in the south and southeast of Nanjing (Page 11 line 29-30)”

14. *Table 2: I can understand that the authors want to compare with other studies, but I don’t believe there are only four previous studies have reported lev concentration in the whole literature.*

Reply: More relevant researches were involved in Table 2 to give a more comprehensive description of levoglucosan levels in PM<sub>2.5</sub> under diverse types of environment.

Attached is the revised Table 2 (Page 37).



**Table 2. Comparison of levoglucosan concentration range in PM<sub>2.5</sub> during this study with those reported in the literature.**

| Sampling Site                  | Site Type | Sampling Time    | Concentration Range<br>(ng m <sup>-3</sup> ) | Reference                         |
|--------------------------------|-----------|------------------|----------------------------------------------|-----------------------------------|
| Azores, Portugal               | coastal   | Winter           | 6.6                                          | (Puxbaum et al., 2007)            |
| Puy de Dôme, France            | coastal   | Winter           | 18.3                                         |                                   |
| Schauinsland, Germany          | coastal   | Winter           | 33.7                                         |                                   |
| Sonnblick, Austria             | coastal   | Winter           | 12.4                                         |                                   |
| Summit, Greenland              | coastal   | May-December     | 0.3                                          | (von Schneidemesser et al., 2009) |
| Jilin, China                   | forest    | July             | 42 (32-67)                                   | (Wang et al., 2008)               |
| Shanghai, China                | forest    | June             | 143 (20-212)                                 |                                   |
| Guangdong, China               | forest    | August           | 25 (0.3-61)                                  |                                   |
| Hainan, China                  | forest    | November         | 107 (19-398)                                 |                                   |
| Izana, Sahara                  | forest    | August           | 0.5                                          | (García et al., 2017)             |
| Ovens, Australia               | rural     | Autumn           | 870                                          | (Reisen et al., 2011)             |
| Manjimup, Australia            | rural     | Autumn           | 1060                                         |                                   |
| Langley, Canada                | rural     | August           | 26                                           | (Leithead et al., 2006)           |
| Hok Tusi, Hong Kong            | rural     | Spring           | 30                                           | (Sang et al., 2011)               |
| Kowloon, Hong Kong             | urban     | Spring           | 36                                           |                                   |
| National University, Singapore | urban     | September        | 91.2                                         | (Yang et al., 2013)               |
| Grenoble, France               | urban     | January          | 815                                          | (Favez et al., 2010)              |
| Beijing, China                 | urban     | Summer           | 230                                          | (Cheng et al., 2013)              |
|                                |           | BB episode       | 750                                          |                                   |
|                                |           | Typical summer   | 120                                          |                                   |
|                                |           | Winter           | 590                                          |                                   |
|                                |           | Firework episode | 460                                          |                                   |
|                                |           | Typical winter   | 640                                          |                                   |
| Shanghai, China                | urban     | Spring           | 66 (18-159)                                  | (Li et al., 2016)                 |
|                                |           | Summer           | 28 (8.6-194)                                 |                                   |
|                                |           | Autumn           | 229 (13-1606)                                |                                   |
|                                |           | Winter           | 161 (26-614)                                 |                                   |
| Nanjing, China                 | urban     | Winter           | 373 (22.4-1476)                              | Current study                     |

Anonymous Referee #2

*The study quantitatively evaluated the influence of long-range transport of biomass burning (BB) emissions on carbonaceous aerosols in Nanjing city, China, which is helpful to understand the sources and associated contributions to aerosol carbonaceous component in urban regions in China. Following issues need to be addressed prior to publication.*

- 1. One concern is about the relative contributions of long-range transport BB versus the local domestic BB emissions shown in Fig. 7. Though the levoglucosan concentration contained in air masses from southeast China is higher than that from the coastal region of eastern China, the air mass frequency from the latter air mass cluster (32.5%) is much higher than the former one (20%). After weighted with the cluster frequency, I would say the contribution from coastal eastern China actually is larger than that from southeast China. I understand that the long-range BB could contribute to aerosols in Nanjing significantly during certain time period, but, from long-term perspective, it might not be the case due to the large contribution from local domestic BB emissions. As such, the authors may want to make changes on the statements related to the contribution of long-range contribution.*

Reply: As suggested, we have revised the statements (Page 12 line 1-2, line 7-10). The revised statements along with original statements in Page 12 line 2-7 make a more comprehensive discussion about the contribution of long-range transport and the potential impacts from domestic biomass burning emissions in this study. The statements after revision are as below ‘In addition, there was a notable cluster originating from the coastal site of eastern China and mainly passing through Shanghai and Jiangsu, where no fire signals were found. But this cluster had a relatively high mean levoglucosan concentration ( $673 \text{ ng m}^{-3}$ ). According to the research by Zhou et al. (Zhou et al., 2017) on the biomass burning emission inventory, domestic straw burning was responsible for ~42 % of total biomass burning in China in 2012, and ~1.5 Gg and ~80 Gg  $\text{PM}_{2.5}$  came from domestic burning in Shanghai and Jiangsu, respectively. It illustrated the significant impact of indoor biomass burning which was invisible in MODIS fire spots map. Therefore, the levoglucosan enrichment of the cluster from coastal area might be due to domestic biomass burning. The air mass frequency of this cluster was 32.5%, the largest one among that for all clusters, which means domestic biomass burning in the eastern China much influenced aerosols in Nanjing. Local domestic biomass burning should be taken as an important factor to study aerosols of eastern China in further study, even though open biomass burning from long-range transport played a significant role in this study.’

The original relative statements were ‘Notably, there is a cluster originating from the coastal site of eastern China mainly passing through Shanghai and Jiangsu, where no fire signals are found. But this cluster has a relatively high mean levoglucosan concentration ( $673 \text{ ng m}^{-3}$ ). According to the research by Zhou et al. (Zhou et al., 2017) on biomass burning emission inventory, domestic straw burning was responsible for ~42 % of total biomass burning in China in 2012, and ~1.5 Gg and ~80 Gg  $\text{PM}_{2.5}$  came from domestic

2. *The physical and optical properties of black carbon after emitted into atmosphere for certain time can be largely modified by the aging process (e.g., Peng et al., PNAS, 2016; Wang et al., JAMES, 2018). Please add some reviews regarding soot aging in the introduction section on page 4 when reviewing the alterations of physical and optical properties with the transport process.*

Reply: As suggested, we added review about soot aging in the introduction as ‘Using a novel chamber method, Peng et al., (2016) found two stages in the aging of BC: initial transformation with little absorption variation and subsequent growth with a profound absorption enhancement. The fact was also revealed that BC under more polluted urban background had a more remarkable impact on the pollution development and the radiative forcing enhancement (Peng et al., 2016). Model simulations calibrated by chamber measurement showed significant differences in BC burden and radiative forcing from the simulations without considering BC aging. In addition, BC coating materials from aging processes were found responsible for a net increase of BC radiative forcing (Wang et al., 2018b) (Page 4 lines 21-27)’.

3. *In abstract: when talking about absorption of carbonaceous aerosols, the two terms (i.e., WSOC and water soluble BrC) are basically equivalent, but the authors switched back and forth to use them. Please stick to one expression.*

Reply: As suggested, water-soluble BrC has replaced WSOC when talking about the radiative absorption in abstract (Page 2 line 1-3). The revised statements are ‘The solar energy absorption of water-soluble BrC due to biomass burning was estimated as  $0.2 \pm 0.1$  (0.0-0.9)  $\text{W m}^{-2}$ . Potential Source Contribution Function model simulations showed that the solar energy absorption induced by water-soluble BrC and EC aerosols was mostly due to the regional transported carbonaceous aerosols from the source regions such as southeast China.’

The original statements were ‘The solar energy absorption of WSOC due to biomass burning was estimated as  $0.2 \pm 0.1$  (0.0-0.9)  $\text{W m}^{-2}$ . Potential Source Contribution Function model simulations showed that the solar energy absorption induced by WSOC and EC aerosols was mostly due to the regional transported carbonaceous aerosols from the source regions such as southeast China.’

4. *Since the observations are ground-based, while the back-trajectory analysis focuses on 500m level. Are the conclusions about relative contributions from different air mass clusters sensitive to the selected altitude?*

Reply: Considering that the planetary boundary layer usually has a lower height in wintertime, 500 m is a proper height set as the planetary boundary layer height, which is universal in other study (Yang et al., 2017).

5. *Typos Line 26 page 2: missing a preposition at “. . . frequently method biomass burning. . .”*

Reply: The statement has been revised as ‘In the observation-based studies, the characteristic ratio calculation and positive matrix factorization (PMF) are frequently methods to calculate biomass burning contribution’ (Page 2 line 29-31)’.

The original statement was ‘In the observation-based studies, the characteristic ratio calculation and positive matrix factorization (PMF) are the most frequently methods biomass burning contribution.’

Anonymous Referee #3

*The manuscript measured the chemical and optical properties of carbonaceous aerosols in Nanjing and attempted to elaborate impacts of the biomass burning (BB) originated from regional transport on the carbonaceous aerosols. The topic is of interest but the manuscript is not well written. There are several factors hinder publication of the manuscript at the present form, and a major revision is needed.*

Major comments:

- 1. The title is “Impact of regional-transported biomass burning emissions on chemical and optical properties of carbonaceous aerosols in Nanjing, East China”. Therefore, It is assumed that the measured aerosol properties in Nanjing with and without BB impact should have large difference. Figure 5 shows that there are moments with low BB impact on Nanjing. Did the chemical and optical properties of carbonaceous aerosols under the low BB influence reveal a significant difference from those under the high BB influence?*

Reply: As suggested, T-test method has been applied to test the significance of chemical and optical properties difference between samples with high BB influence (BB-OC > 20.9%) and samples with low BB influence (BB-OC < 20.9%), where 20.9% is the mean BB-OC value of the event in this study. The T-test results shows that all of carbonaceous components (OC, EC, WSOC), BB tracers (lev, man, gal) and  $b_{\text{abs}}$  of water-soluble BrC exhibits a significant difference between samples under high and low BB influence ( $h = 1$ ,  $p < 0.05$ ). For a better representative of the study, we changed the title as “**Chemical and Optical Properties of Carbonaceous Aerosols in Nanjing, East China: Regional-transported Biomass Burning Contribution** (Page 1 line 1-3)”.

Attached table shows the T-test results:

|     | OC     | EC     | WSOC   | levoglucosan | mannan | galactosan | $b_{\text{abs}}$ |
|-----|--------|--------|--------|--------------|--------|------------|------------------|
| h   | 1      | 1      | 1      | 1            | 1      | 1          | 1                |
| sig | 0.0111 | 0.0083 | 0.0022 | 0.0000       | 0.0000 | 0.0000     | 0.0004           |

- 2. Figure 5 shows that the fraction of BB-OC and BB-WSOC is nearly the same throughout the measurement. Does this mean that the emission ratios of WSOC/OC from other anthropogenic sources are the same as BB, or is it the coincidence from the calculation by the equation 6 and 7?*

Reply: We agree that the same trends and the good correlation of BB-OC and BB-WSOC in Figure 5 were due to the calculation coincidence.

However, even though the reference parameters for BB-OC and BB-WSOC calculation are from two

$$BB - OC = \frac{(lev/(1000 \times OC))_{ambient}}{0.082} \times 100 \%, lev: ng \, m^{-3}; OC: \mu g \, m^{-3} \quad (6)$$

(Zhang et al., 2010; Puxbaum et al., 2007; Zdráhal et al., 2002; Sang et al., 2011). In biomass burning source emission tests for three major types of cereal straw (corn, wheat, and rice) in China, 0.082 was reported as the lev/OC ratio for PM<sub>2.5</sub> (Zhang et al., 2007). This value can be used in combination with the lev/OC ratios of our PM<sub>2.5</sub> samples to roughly estimate the contribution of biomass burning smoke to the ambient OC.'

The statements about BB-WSOC calculations are in Page 10 line 27-31, as 'The contribution from biomass burning to the WSOC in PM<sub>2.5</sub> (BB-WSOC) trend in Fig. 5 makes the above analysis more convincing due to the consistency of the contributions computed by two different methods. BB-WSOC was estimated with Eq. (7):

$$BB - WSOC = \frac{(lev/WSOC)_{ambient}}{0.17} \times 100 \%, lev/WSOC: \mu g \, \mu gC^{-1} \quad (7)$$

which used a lev/WSOC ratio of 0.17  $\mu g \, \mu gC^{-1}$  from the test burns of rice straws and wheat straw (Yan et al., 2015)'

Attached is Figure 5 (Page 27)

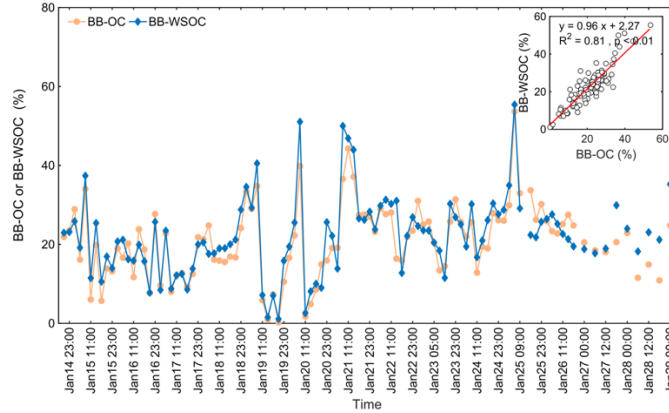

**Figure 5: Time series of biomass burning contribution to OC (BB-OC) and WSOC (BB-WSOC).**

3. *Since the authors attempted to investigate the impact of BB on carbonaceous aerosols, why did the authors only measure the absorption of BrC in WSOC, instead of the absorption of total BrC in OC? There are also water-insoluble BrC from BB.*

Reply: First, WSOC accounted for averaged 50% and up to 90% of OC and showed a stronger correlation with light-absorbing property ( $b_{abs}$ ) than OC in our study ( $R^2 = 0.76$  for WSOC and  $R^2 = 0.72$  for OC,  $p < 0.01$ ). Additionally, previous studies showed that biomass burning was one of the predominant sources of WSOC and water-soluble BrC (Hoffer et al., 2006). Therefore, it's of great significance to discuss the light-absorbing property of WSOC in particular.

Hoffer, A., Gelencsér, A., Guyon, P., Kiss, G., Schmid, O., Frank, G. P., Artaxo, P., and Andreae, M. O.: Optical properties of humic-like substances (HULIS) in biomass-burning aerosols, *Atmos. Chem. Phys.*, 6, 3563-3570, 10.5194/acp-6-3563-2006, 2006.

Liu, J., Bergin, M., Guo, H., King, L., Kotra, N., Edgerton, E., and Weber, R. J.: Size-resolved measurements of brown carbon in water and methanol extracts and estimates of their contribution to ambient fine-particle light absorption, *Atmos. Chem. Phys.*, 13, 12389-12404, 10.5194/acp-13-12389-2013, 2013.

4. *Page 8, Line 17, the authors concluded that secondary OC is weak and stable only based on the OC/EC ratio ranging from 2 to 4 during the severe pollution period. The conclusion is arbitrary. Firstly, the OC/EC ratio ranging from 2 to 4 are rather large. Secondly, previous studies have indicated that SOA contribution during haze days during wintertime in China is considerable. For example, Huang et al. (2014) showed SOA contributed 44%-71% to the OA mass in four megacities of China during wintertime. Sun et al. (2013) revealed that SOA contributed 31% to the OA mass in Beijing in winter.*

Reply: As suggested, we revised the statements and added the references to describe the results more objectively, as ‘As the pollution got more severe over time, it shrank to 2.0-4.0 after 16 Jan, indicating that the secondary sources had a relatively stable but still considerable impact on PM<sub>2.5</sub> at the polluted stage. According to the previous studies, secondary organic aerosol (SOA) usually played an important role in the wintertime air pollution (Huang et al., 2014; Sun et al., 2013)’ (Page 8 line 22-25).

The original statements were ‘In contrast to combustion sources, the secondary sources had a relatively weak and stable impact on PM<sub>2.5</sub> at the polluted stage.’

Minor comments:

5. *Page 2, Lines 11-15: What is the difference among those portions of OC?*

Reply: Each portion of OC has different size distributions, chemical molecular compositions or physical morphology (i.e. fractal or spherical) leading to the different optical properties. Here, we introduced a relative reference in the text (Page 2 line 15). According to the literature, this classification depends on the optical property of OC, as stated in text ‘Meanwhile, a portion of organic carbon (OC) could yield a cooling effect on the land surface by scattering sunlight (Zhang et al., 2017; Myhre et al., 2013). A portion of OC involves in the aging process of elemental carbon (EC) or black carbon (BC) as coating materials for the BC core, enhancing BC radiative absorption (Peng et al., 2016; Wang et al., 2018b). A fraction of OC can also directly absorb solar energy functioning similarly as BC, which is referred to as brown carbon (BrC) (Laskin et al., 2015). But BrC is different from BC due to its strong light absorption from visible (VIS) to ultraviolet (UV) wavelengths, thus having a stronger wavelength dependence than BC (Andreae and Gelencsér, 2006)’ (Page 2 line 11-17).

17), only describing the light absorbing characteristics of BrC which is different from BC. The estimated radiative forcing of BC and BrC in other literature were given following this sentence that ‘Radiative forcing of BC is estimated to be 0.2-1.2 W m<sup>-2</sup> (Moffet and Prather, 2009), while radiative forcing of BrC contribution is suggested to be up to 0.25 W m<sup>-2</sup> or to contribute to 19 % of the total atmospheric absorption computed by model simulations (Feng et al., 2013) (Page 2 Line 17-19)’, showing that BC makes a stronger radiative forcing than BrC, but BrC absorption is non-negligible.

7. *Page 2, Line 26: what is “the most frequently method”?*

Reply: The statement has been revised to eliminate the expression ambiguity as ‘In the observation-based studies, the characteristic ratio calculation and positive matrix factorization (PMF) are frequently used methods to calculate biomass burning contribution (Page 2 line 29-31)’. Both the characteristic ratio calculation and positive matrix factorization (PMF) are frequently methods to calculate the biomass burning contribution, which were applied in this study.

The original statements were ‘In the observation-based studies, the characteristic ratio calculation and positive matrix factorization (PMF) are the most frequently methods biomass burning contribution.’

8. *Page 3, Line 3, “that” should be removed?*

Reply: It has been revised to as suggested (Page 3 line 7-8).

9. *Page 3, Line 18, “impact” should read “impacts”.*

Reply: It has been revised as suggested (Page 3 line 22).

10. *Page 3, Line 21: “than” should read “compared to”.*

Reply: It has been revised as suggested (Page 3 line 25).

11. *Page 3, Lines 25-27: Are the three parameters are specially used for BrC from BB?*

Reply: These three parameters are main parameters to describe optical properties of both BrC and EC from all kinds of sources. Research about biomass burning involving these parameters are listed afterwards, for our study focuses on the impact of biomass burning. We removed the misleading statements. The revised statements are ‘Light-absorbing parameters including absorption coefficient, mass absorption efficiency and absorption Angstrom exponent, have been involved to describe the light absorption characteristics of BrC (Alexander et al., 2008; Yang et al., 2009; Chakrabarty et al.,



calculated mass absorbance efficiency for WSOC from a biomass burning factor derived from positive matrix factorization (PMF) receptor model. It showed that the biomass burning source contributed to 58% of total light absorption at 365 nm and WSOC associated with sulfate and oxalate contributed to 21% (Page 3 line 29-Page 4 line 3).'

*12. Page 3, Lines 28: What is HULIS?*

Reply: The full name of HULIS, 'humic-like substances' has been added where HULIS was first presented (Page 3 line 32).

*13. Page 7, Line5, "give" should be "given".*

Reply: It has been revised as suggested (Page 7 line 12).

*14. Page 8, Line 10, "uncertainty" should be "variation"*

Reply: It has been revised as suggested (Page 8 line 16).

*15. Page 10, Line 25, "which illustrating the necessity of parameter BB-OC". The sentence is hard to understand.*

Reply: We removed the sentences after Page 10 line 26, which were not closely related to the main idea of this paragraph.

The removed sentences are ' There were three remarkable BB-OC peaks at 08:00 on 20 Jan, 14:00 on 21 Jan and 08:00 on 25 Jan in Fig. 5, indicating the large contributions of biomass burning during those periods. However, EC and biomass burning tracers were not rich at 08:00 on 20 Jan, implying that combustion activities were not highly intense at that time. But it doesn't contradict the fact that biomass burning made a significant contribution to OC compared to other pollution sources at 08:00 on 20 Jan. It demonstrates that it's very necessary to use BB-OC to depict the contribution of biomass burning instead of biomass burning tracer levels, for BB-OC excludes the influence of the OC level. '

# Chemical and Optical Properties of Carbonaceous Aerosols in Nanjing, East China: Regional-transported Biomass Burning Contribution

Xiaoyan Liu<sup>1,2,3,4</sup>, Yan-Lin Zhang<sup>1,2,3</sup>, Yiran Peng<sup>5,6</sup>, Lulu Xu<sup>5,6</sup>, Chunmao Zhu<sup>7</sup>, Fang Cao<sup>1,2,3</sup>, Xiaoyao  
5 Zhai<sup>1,2,3</sup>, Mozammel Haque<sup>1,2,3</sup>, Chi Yang<sup>1,2,3</sup>, Yunhua Chang<sup>1,2,3</sup>, Tong Huang<sup>1,2,3</sup>, Zufe Xu<sup>1,2,3</sup>,  
Mengying Bao<sup>1,2,3</sup>, Wenqi Zhang<sup>1,2,3</sup>, Meiyi Fan<sup>1,2,3</sup>, Xuhui Lee<sup>1,2,3,4</sup>

<sup>1</sup>Yale-NUIST Center on Atmospheric Environment, Joint International Research Laboratory of Climate and Environment Change (ILCEC), Nanjing University of Information Science and Technology, Nanjing 210044, China

10 <sup>2</sup>Key Laboratory of Meteorological Disaster Ministry of Education (KLME), Collaborative Innovation Center on Forecast and  
Evaluation of Meteorological Disasters (CIC-FEMD), Nanjing University of Information Science and Technology, Nanjing  
210044, China

<sup>3</sup>School of Applied Meteorology, Nanjing University of Information Science and Technology, Nanjing 210044, China

<sup>4</sup>School of Forestry and Environmental Studies, Yale University, New Haven 06511, USA

15 <sup>5</sup>Ministry of Education Key Laboratory for Earth System Modeling, Department of Earth System Science, Tsinghua  
University, Beijing 100084, China

<sup>6</sup>Joint Center for Global Change Studies (JCGCS), Beijing 100084, China

<sup>7</sup>Research and Development Center for Global Change, Japan Agency for Marine-Earth Science and Technology, Yokohama  
236-0001, Japan

*Correspondence* : Yan-Lin Zhang (dryanlinzhang@outlook.com, zhangyanlin@nuist.edu.cn)

20 **Abstract.** Biomass burning can significantly impact the chemical and optical properties of carbonaceous aerosols. Here, the  
biomass burning impacts were studied during wintertime in a megacity of Nanjing, East China. The high abundance of biomass  
burning tracers such as levoglucosan (lev), mannosan (man), galactosan (gal) and non-sea-salt potassium (nss-K<sup>+</sup>) was found  
during the studied period with the concentration ranges of 22.4-1476 ng m<sup>-3</sup>, 2.1-56.2 ng m<sup>-3</sup>, 1.4-32.2 ng m<sup>-3</sup>, and 0.2-3.8 μg  
m<sup>-3</sup>, respectively. The biomass burning contribution to WSOC and OC was in the range of 1.1-55.4 % and 0.2-53.6 %,   
25 respectively. Backward air mass origin analysis, potential emission sensitivity of element carbon (EC), and MODIS fire spot  
information indicated that the elevations of the carbonaceous aerosols were due to the transported biomass-burning aerosols  
from southeastern China. The characteristic mass ratio maps of lev/man and lev/nss-K<sup>+</sup> suggested that the biomass fuels were  
mainly crop residuals. Furthermore, the strong correlation (p < 0.01) between biomass burning tracers (such as lev) and light  
absorption coefficient (b<sub>abs</sub>) for water soluble organic carbon (WSOC) revealed that biomass burning emissions played a  
30 significant role in the light-absorption properties of carbonaceous aerosols. The solar energy absorption due to water-soluble  
brown carbon (BrC) and EC was estimated by the calculation-based on measured light-absorbing parameters and the  
simulation-based on a radiative transfer model (RRTMG\_SW). The solar energy absorption of water-soluble BrC in short  
wavelengths (300-400 nm) was 0.8 ± 0.4 (0.2-2.3) W m<sup>-2</sup> from the calculation-based and 1.2 ± 0.5 (0.3-1.9) W m<sup>-2</sup> from the  
RRTMG\_SW model. The absorption capacity of water-soluble BrC accounted for about 20-30% of the total absorption of EC

aerosols. The solar energy absorption of water-soluble BrC due to biomass burning was estimated as  $0.2 \pm 0.1$  (0.0-0.9)  $\text{W m}^{-2}$ . Potential Source Contribution Function model simulations showed that the solar energy absorption induced by water-soluble BrC and EC aerosols was mostly due to the regional transported carbonaceous aerosols from the source regions such as southeastern China. Our results illustrate the importance of the absorbing water-soluble brown carbon aerosols in trapping additional solar energy in the low-level atmosphere, heating the surface and inhibiting the energy from escaping the atmosphere.

## 1 Introduction

Biomass burning is of great concern in recent years due to its severe impact on air quality and climate (Zhang et al., 2015; Gilman et al., 2015; Chen et al., 2017b). Water-soluble organic carbon (WSOC) from biomass burning emission has a pronounced influence on the increase of aerosol cloud condensation nuclei (CCN) activity, which can lead to a cooling impact (Gao et al., 2003; Rogers et al., 1991; Novakov and Corrigan, 1996). Meanwhile, a portion of organic carbon (OC) could yield a cooling effect on the land surface by scattering sunlight (Zhang et al., 2017; Myhre et al., 2013). A portion of OC involves in the aging process of elemental carbon (EC) or black carbon (BC) as coating materials for the BC core, enhancing BC radiative absorption (Peng et al., 2016; Wang et al., 2018b). A fraction of OC can also directly absorb solar energy functioning similarly as BC, which is referred to as brown carbon (BrC) (Laskin et al., 2015). But BrC is different from BC due to its strong light absorption from visible (VIS) to ultraviolet (UV) wavelengths, thus having a stronger wavelength dependence than BC (Andreae and Gelencsér, 2006). Radiative forcing of BC is estimated to be  $0.2\text{-}1.2 \text{ W m}^{-2}$  (Moffet and Prather, 2009), while radiative forcing of BrC contribution is suggested to be up to  $0.25 \text{ W m}^{-2}$  or to contribute to 19 % of the total atmospheric absorption computed by model simulations (Feng et al., 2013). As a part of WSOC, water-soluble BrC are rich in the biomass burning smoke (Washenfeller et al., 2015). Taken together, biomass burning can affect climate and aerosol chemical compositions in an extremely complex way. All effects mentioned above are both regional and global owing to the aerosols long-range transport. Studies based on numerical simulations have shown that emissions from biomass burning can be transported to remote sites, even across the oceans (Aouizerats et al., 2015; Zhu et al., 2016; Ancellet et al., 2016). Aouizerats et al. (2015) modeled a large fire-induced haze episode in 2006 stemming mostly from Indonesia using the Weather Research and Forecasting model coupled with chemistry (WRF-Chem) and found out the notable impact of long-range transported aerosols from Indonesia on ambient air quality and climate in Singapore. Ancellet et al. (2016) made the assessment of aerosol transport from North America to Europe using forward simulations of the FLEXPART Lagrangian particle dispersion model. Due to the significant role of carbonaceous aerosols in biomass burning plumes, it is important to quantify the contribution from biomass burning to carbonaceous species such as OC, EC, WSOC, and BrC. In the observation-based studies, the characteristic ratio calculation and positive matrix factorization (PMF) are frequently used methods to calculate biomass burning contribution. OC and EC proportions released by biomass burning were shown to be  $45 \% \pm 12 \%$  and  $12 \% \pm 7.3 \%$ , respectively, in the harvest season in Daejeon, Korea (Jung et al., 2014). These numbers are comparable with the results for the harvest seasons in Yangtze River Delta region, China, where biomass burning contributed 51 % and 16 % to OC and EC

concentrations, respectively (Chen et al., 2017a). The share of OC in PM<sub>2.5</sub> produced by biomass burning in Beijing ranged from 18 % to 70 % in different seasons and areas (Duan et al., 2004; Zhang et al., 2008a; Cheng et al., 2013). In addition, a large quantity of BrC with light-absorbing property was detected in biomass burning emissions in South Asia and the United States, and in some controlled wood pyrolysis experiments (Bosch et al., 2014; Chen and Bond, 2010; Hecobian et al., 2010; Kirchstetter et al., 2004). It was reported that  $23 \pm 7$  % and  $16 \pm 7$  % of WSOC originated from biomass burning in Beijing, in winter and summer, respectively (Yan et al., 2015). Meanwhile, the contributions of biomass burning to WSOC in PM<sub>10</sub> in Mexico ranged from 7 % to 57 % (Tzompa-Sosa et al., 2016). These studies have demonstrated a significant importance of biomass burning contributions to carbonaceous aerosols. Levoglucosan is recommended to be a biomass burning tracer because it is uniquely derived from cellulose pyrolysis (Simoneit et al., 1999; Simoneit, 2002; Simoneit et al., 2004). Levoglucosan has been initially quantified by gas chromatography-mass spectrometry (GC-MS) with a relatively complex operation procedure and at a high cost (Fraser and Lakshmanan, 2000; Graham et al., 2003; Oros and Simoneit, 2001). With the improvement of technology, a new detection method, named high-performance anion-exchange chromatography coupled to pulsed amperometric detection (HPAEC-PAD), has emerged (Engling et al., 2006). The HPAEC-PAD approach is as reliable as traditional methods (such as GC), but with a higher efficiency, an easier operation and a lower cost. The new method can simultaneously quantify other carbohydrates in ambient samples including mannosan and galactosan which are also anhydrosugars and used as tracers of biomass burning like levoglucosan (Engling et al., 2006; Jung et al., 2018; Tsai et al., 2015). Additionally, non-sea-salt potassium (nss-K<sup>+</sup>) is also a tracer of biomass burning, calculated by the formula:  $\text{nss-K}^+ = \text{K}^+ - 0.0335 \times \text{Na}^+$ , to exclude K<sup>+</sup> originated from seawater (Lai et al., 2007; Cao et al., 2016). Nowadays, the above four tracers are applied to both qualitatively and quantitatively investigate the biomass burning impact. Furthermore, their characteristic ratios help researchers to better recognize the biomass fuel types (Puxbaum et al., 2007; Mochida et al., 2010; Wang et al., 2011; Cheng et al., 2014; Zhang et al., 2012; Cheng et al., 2013).

Biomass burning aerosol has significant impacts on regional and global radiative forcing (Ramanathan and Carmichael, 2008). There is no doubt that element carbon increases solar absorption of ambient aerosols most effectively (Ramanathan and Carmichael, 2008; Myhre and Samset, 2015; Li et al., 2016b). Lack et al. (2012) found that the absorptivity of BC and primary organic matter mixture has 70% enhancement in biomass burning period compared to normal days in Boulder, Colorado. Meanwhile, the role of BrC in the radiation balance of the climate system has attracted increasing interest. Shamjad et al. (2015) mentioned that the atmospheric radiative forcing of total aerosol increases by 56%, and the forcing of BrC aerosol increases by 38% in the biomass burning season comparing to other seasons in Kanpur, India. Light absorption characteristics of WSOC aerosols are key factors in the climate forcing calculation. Light-absorbing parameters including absorption coefficient, mass absorption efficiency and absorption Angstrom exponent, have been involved to describe the light absorption characteristics of BrC (Alexander et al., 2008; Yang et al., 2009; Chakrabarty et al., 2016; Choudhary et al., 2017; Srinivas et al., 2016). Hoffer et al. (2006) investigated the optics of humic-like substances (HULIS) in Amazon basin and found that the contribution of HULIS to total aerosol absorption was as high as 50% at the wavelength of 300 nm. Hecobian et al. (2010) measured the optical properties of WSOC in Atlanta, US and their results showed that the absorption coefficient around 365 nm had a strong correlation with WSOC from biomass burning or from urban emissions. Du et al. (2014a) calculated mass

absorbance efficiency for WSOC from a biomass burning factor derived from positive matrix factorization (PMF) receptor model. It showed that the biomass burning source contributed to 58% of total light absorption at 365 nm and WSOC associated with sulfate and oxalate contributed to 21%. Using a simplistic absorption-based model, Kirillova et al. (2014b) estimated the relative absorptive forcing of WSOC compared to EC in winter season at New Delhi, India. Their results indicated that the contribution of WSOC to total absorption was between 3% and 11%. Li et al. (2016a) applied a similar method in the Tibetan Plateau and found that the WSOC radiative forcing accounted for  $6.03 \pm 3.62\%$  and  $11.41 \pm 7.08\%$  of EC radiative forcing at two stations there, respectively. The afore-mentioned method provides a rough estimation on the absorption of solar energy by WSOC and EC, by using the measured sample concentrations of WSOC and EC and the optical properties of WSOC. Many assumptions were applied in that method, thus uncertainties in the estimated forcing could be substantial. Additionally, Jung et al. (2015) evaluated the instantaneous forcing of WSOC. They calculated the aerosol optical properties and applied a simplified expression to account for the radiative transfer process. Their results showed that the radiative forcing of WSOC aerosol (assumed core-shell mixing with inorganic components) range from  $-0.07$  to  $-0.49 \text{ W m}^{-2}$  at the top-of-atmosphere. In a most recent study, Panicker et al. (2017) applied an aerosol optical model embedded in a radiative transfer model to investigate the radiative forcing for OC and EC under two urban environments in Northern India. The model can produce quite realistic results as long as the default database and user-specified inputs represent the real atmospheric condition in model. In this study, we follow to estimate the radiative forcing of BrC and WSOC with a radiative transfer model.

Physical and optical properties of carbonaceous aerosols alter with the transport process and modify their radiative forcing accordingly. For example, pollutants from biomass burning in North Asia and North America can transport to Arctic with the poleward jet in mid-latitude and have non-negligible effect on Arctic climate (Shindell and Faluvegi, 2009). During the transport process, BC and BrC are prone to be internally mixed with other gas and particle pollutants from biomass burning, resulting in multiplication of the absorptivity due to the lensing effect (Bond and Bergstrom, 2006). Using a novel chamber method, Peng et al., (2016) found two stages in the aging of BC: initial transformation with little absorption variation and subsequent growth with a profound absorption enhancement. The fact was also revealed that BC under more polluted urban background had a more remarkable impact on the pollution development and the radiative forcing enhancement (Peng et al., 2016). Model simulations calibrated by chamber measurement showed significant differences in BC burden and radiative forcing from the simulations without considering BC aging. In addition, BC coating materials from aging processes were found responsible for a net increase of BC radiative forcing (Wang et al., 2018b). Quantification of BrC property change with the transport of biomass burning aerosols and estimation of its contribution to the regional radiative forcing are both essential for better understanding the climate effect of BrC. So far only a few studies have focused on the light-absorbing property of BrC from biomass burning in China (Cheng et al., 2011; Du et al., 2014a; Yan et al., 2015). It was shown that over short wavelengths (300-400nm), light absorption by WSOC, which is often used as the surrogate for water-soluble BrC, was  $\sim 40\%$  and  $\sim 25\%$  of that by EC in winter and summer, respectively (Yan et al., 2015). However, the BrC light absorption quantification due to biomass burning has not been identified.

China, the top crop-producing country in the world has a history of burning crop-residuals (Zhang et al., 2016), making China a hotspot of biomass burning research. As soon as it became evident that biomass burning emission is detrimental to the

environment and human health, China's governments introduced policies to prohibit straw burning. These policies are now implemented strictly, so that open biomass burning has been quite rare in recent years especially in East China. Under this background, this study mainly aimed at a wintertime pollution event in East China and intended to determine the origin of biomass burning aerosols and figure out the impacts of regional-transported biomass burning on chemical and optical properties of carbonaceous aerosols. To achieve these goals, 3 h PM<sub>2.5</sub> samples has been collected and analyzed to determine the aerosols chemical compositions and light-absorbing properties. The solar energy absorption of carbonaceous aerosols was estimated by the calculation-based on measured light-absorbing parameters and the simulation-based on a radiative transfer model (RRTMG\_SW).

## 2 Method

### 2.1 Site description and sample collection

The observation site NUPT (118.78° E, 32.09° N) was located on the campus of Nanjing University of Posts and Telecommunications. It is in the urban area of East China where is one of the China's economic centres and also one of the world's most advanced manufacturing base. This site represents a severely anthropogenically influenced environment, with a complex pollution pattern contributed by vehicles, industries, biomass burning and atmospheric transport.

The sampling campaign was conducted from 14 Jan 2015 to 30 Jan 2015. PM<sub>2.5</sub> samples were collected at a flow rate of 1.05 m<sup>3</sup> min<sup>-1</sup> with a nominal sampling time of 3 h for each sample. Blank filters were kept in the sampler for 1 min, without air flow, at both the beginning and the end of this campaign. All filters used for sample collection were quartz fiber filters, which had been prebaked at 450° C for 6 h to eliminate organic material.

### 2.2 Sample analysis for carbonaceous components

OC and EC were detected using a Desert Research Institute (DRI) Model 2001 Thermal Optical Carbon Analyzer (Atmoslytic Inc., Calabasas, USA). A portion of sampled filter (0.53 cm<sup>2</sup>) was analyzed following the IMPROVE thermal optical reflectance (TOR) protocol (Bao et al., 2017). For the determination of WSOC, a portion of each filter with a size of 4.02 cm<sup>2</sup> was removed from the parent filter and extracted with 10 mL ultrapure water in a sonication bath for 30 min. The water extracts were filtered through syringe filters (0.22µm, ANPEL, Shanghai, China) for WSOC concentration analysis by a TOC analyzer (TOC-L, Shimadzu, Kyoto, Japan) following the WSTC-WSIC protocol. All the calculations related to the carbonaceous components were blank corrected and the system error between DRI and TOC-L analyzers was corrected by testing sucrose solution of a specific concentration.

### 2.3 Extraction and analysis of ion and carbohydrates

A portion of each sample filter (5.07 cm<sup>2</sup>) was cut off and extracted with 10.0 mL ultrapure water (> 18.2Ω) via ultrasonic agitation (30 min). The extract solution was filtered to remove insoluble materials, then used for ion analysis by ion chromatography on a ThermoFisher Scientific ICS-5000+ system (US) equipped with a gradient pump (SP), a conductivity detector/chromatography compartment (DC) and an automated sampler (AS-DV). The separation of cation was carried out on

an IonPac CS12A analytical column and an IonPac CG12A guard column with aqueous methanesulfonic acid (MSA, 30 mM L<sup>-1</sup>) eluent at a flow rate of 1 mL min<sup>-1</sup>. While anions were separated on an IonPac AS11-HC analytical column and an IonPac AG11-HC guard column using sodium hydroxide (NaOH) gradient elution at a flow rate of 1.5 mL min<sup>-1</sup>: 0-3 min, 0.5 mM L<sup>-1</sup>; 3-5 min, 0.5-5 mM L<sup>-1</sup>; 5-15 min, 5-30 mM L<sup>-1</sup>; 15-20 min, 0.5 mM L<sup>-1</sup>.

- 5 The extraction procedure for carbohydrate analysis was basically same as for ion, except that water volume was changed from 10.0 to 2.0 mL. The equipment of the ion chromatography system used was largely the same, except that a conductivity detector was replaced by an electrochemical detector. The carbohydrates were separated by a CarboPac MA1 column and a matched guard column using NaOH gradient elution at a flow rate of 0.4 mL min<sup>-1</sup>. To determine levoglucosan and galactosan the elution was run in a time-gradient: -15-34 min, 300 mM L<sup>-1</sup>; 34-45 min, 300-480 mM L<sup>-1</sup>; 45-60 min, 480 mM L<sup>-1</sup>. For  
10 mannosan, the elution was run in another time-gradient: -15-5 min, 50 mM L<sup>-1</sup>; 5-25 min, 250 mM L<sup>-1</sup>; 25-35 min, 250-350 mM L<sup>-1</sup>; 30-40 min, 350-650 mM L<sup>-1</sup>; 40-70 min, 650 mM L<sup>-1</sup>. The volume of Loop was 200 µL. All ions and carbonaceous components amount calculations were corrected by the mean value of two field blanks.

## 2.4 Extraction and analysis of WSOC light-absorbing property

- A fraction of sampled filter (5.02 cm<sup>2</sup>) was cut and extracted with 2 mL ultrapure water. The filter extract was tested for light  
15 absorption by an ultraviolet-visible absorption spectrophotometer (UV-2600, Shimadzu, Kyoto, Japan) with a scanning wavelength range of 200-800 nm. Absorption coefficient ( $b_{abs}$ , M m<sup>-1</sup> or 10<sup>-6</sup> m<sup>-1</sup>) at 365 nm was calculated by Eq. (1):

$$b_{abs} = (A_{365} - A_{700}) \times (V_{water} \times Factor) \times \ln(10) \div (V_{aero} \times L), \quad (1)$$

- where  $A_{365}$  and  $A_{700}$  refer to absorbance (or light attenuation) at 365 and 700 nm, respectively, measured by the spectrometer;  $V_{water}$  (mL) corresponds to the volume of the aqueous extract (water);  $Factor$  is set to 103, which is estimated from the  
20 absorption signal for the full filter;  $V_{aero}$  (m<sup>3</sup>) refers to the volume of air filtered; and  $L$  (mm) is the path length of the cell (10mm). Choice of 365 nm as the reference wavelength to represent light absorption of WSOC is made according to the strong light-absorbing capacity and also is meant to avoid light-absorbing disturbance by other substances in the extract. Absorbance at 700 nm represents the baseline drift in the analysis (Bosch et al., 2014; Cheng et al., 2011; Hecobian et al., 2010). Mass absorption efficiency (MAE, m<sup>2</sup> g<sup>-1</sup>) of BrC in WSOC was derived from Eq. (2):

$$25 \quad MAE = b_{abs}/WSOC, \quad (2)$$

where WSOC refers to the concentration of WSOC (µg m<sup>-3</sup>). Absorption Angstrom exponents (AAE) were computed by Eq. (3):

$$b_{abs} \approx K \cdot \lambda^{-AAE}, \quad (3)$$

- where  $K$  is a constant,  $AAE$  describes the wavelength-dependent absorption enhancement of BrC, associated with its origin,  
30 size and composition (Bikkina, 2014); and  $\lambda$  is wavelength in the range of 310-460 nm. AAE for WSOC was fitted within the range of 310-460 nm in which coefficients of determination ( $R^2$ ) for all samples are above 0.90. The solar energy absorbance of WSOC and EC at the ground level was estimated using Eq. (4) and Eq. (5):



$$E_{WSOC} = \int I(\lambda) \cdot \{1 - e^{-(MAE \cdot (\frac{365}{\lambda})^{AAE} \cdot WSOC \cdot h_{ABL})}\} d\lambda, \quad (4)$$

$$E_{EC} = \int I(\lambda) \cdot \{1 - e^{-(MAE_{EC} \cdot (\frac{550}{\lambda}) \cdot EC \cdot h_{ABL})}\} d\lambda, \quad (5)$$

where  $I(\lambda)$  is the clear sky Air Mass 1 Global Horizontal (AM1GH) solar radiance spectrum at the surface;  $h_{ABL}$  refers to vertical height of the boundary layer, (set to 1000m);  $MAE_{EC}$  is set as  $7.5 \pm 1.2 \text{ m}^2 \text{ g}^{-1}$  which is MAE of EC at 550 nm;  $EC$  ( $\mu\text{g m}^{-3}$ ) is the EC concentration in each sample. The fraction  $E_{WSOC}/E_{EC}$  is the ratio of  $E_{WSOC}$  and  $E_{EC}$  comparing light-absorbing capacity of BrC in WSOC and EC. Here  $E_{WSOC}$ ,  $E_{EC}$  and  $E_{WSOC}/E_{EC}$  were computed in a wavelength range of 300-400 nm (Bosch et al., 2014; Kirillova et al., 2014b; Bond and Bergstrom, 2006; Yan et al., 2015).

## 2.5 Radiative forcing estimation with model

We also estimated the radiative forcing of WSOC and EC with a stand-alone radiative transfer model RRTMG\_SW (Global climate model version of Short Wave Rapid Radiative Transfer Model (Iacono Michael et al., 2000). The correlated-k approach was applied in RRTMG\_SW to calculate radiative fluxes and heating rates in 14 contiguous bands in the shortwave (820-50000  $\text{cm}^{-1}$ ). The stand-alone RRTMG\_SW can be driven by a **given** atmospheric profile. In this study, we prescribed the mid-latitude winter atmospheric profile, which is default in the RRTMG package (Iacono Michael et al., 2008; Mlawer and Clough, 1998). We chose the average solar zenith angle of  $60^\circ$  in the mid-latitude regions (Li, 2017) and ran RRTMG\_SW for clear-sky conditions without the impact of cloud.

Aerosol radiative (absorptive) properties for WSOC and EC are parameterized in terms of their mass concentrations in RRTMG\_SW. The optics per unit mass (mass absorption efficiency ( $MAE^*$ ), single scattering albedo ( $SSA^*$ ), and asymmetry factor ( $g^*$ )) of EC was provided from the Optical Properties of Aerosols and Clouds (OPAC) dataset (Hess et al., 1998). For WSOC, we calculated the optics using the Mie model (Bohren and Huffman, 1998; Pruppacher and Klett, 1997) with the input optics and prescribed size parameters. Refractive Index (RI) was set to be  $1.55-0.112i$  (Kirchstetter et al., 2004; Shamjad et al., 2016). The density of WSOC is  $1.569 \text{ g cm}^{-3}$  (Feng et al., 2013). The dry mode radius and standard deviation of the WSOC particle size distribution were assumed to be  $0.0212 \mu\text{m}$  and 2.24, respectively (Hess et al., 1998). Because WSOC is hydrophilic, we also calculated the wet particle radius and wet RIs according to (Pruppacher and Klett, 1997). The optics of WSOC obtained from the Mie model were provided to RRTMG\_SW for radiative calculations.

## 2.6 Footprint analysis, PSCF models and fire hotspots

The FLEXPART Lagrangian particle dispersion model was used to estimate the footprint of the site (Stohl et al., 1998; Stohl et al., 2005; Grythe et al., 2017). FLEXPART version 10.1 was run in the backward model in which the potential emission sensitivity (PES) of the receptor point is provided (Seibert and Frank, 2004). The operational reanalysed data from the European Centre for Medium-Range Weather Forecasts (ECMWF) at a spatial resolution of  $1^\circ \times 1^\circ$  with 61 vertical levels were used as meteorology. The simulation considered BC (corresponding to EC in this study) as the tracer species, and dry deposition and wet scavenging were accounted for. The output was set as the retention time(s) of particles in each grid during



the simulation period. HYSPLIT 4.8 model from NOAA was used to compute 48 h backward trajectories of air masses reaching Nanjing sites at a planetary boundary layer (PBL) height of 500 m. MODIS fire hotspot data was applied to evaluate open biomass burning intensity during the study period. The Potential Source Contribution Function model (PSCF) was usually applied to localize the potential sources of pollutants. The details about the setup of the model can be seen in the research of Bao et al. in 2017. Here we introduce the light absorbance of WSOC into the model. The higher the PSCF value is, the higher possibility the areas make potential contributions to the light absorbance of WSOC in the aerosols at the receptor site.

### 3. Results and discussion

#### 3.1 Carbonaceous components

The temporal variations of OC/EC ratios, and OC and EC concentrations in PM<sub>2.5</sub> during the studied episode are plotted in Fig. 1. The average concentrations of OC and EC were  $19.1 \pm 8.4 \mu\text{g m}^{-3}$  and  $6.5 \pm 3.4 \mu\text{g m}^{-3}$ , respectively. Our results are comparable to the seasonal mean levels of OC and EC level in PM<sub>2.5</sub> in the winter of 2015 in a nearby site in Nanjing, which were  $22.5 \pm 9.6$  and  $8.2 \pm 3.1 \mu\text{g m}^{-3}$ , respectively (Li et al., 2015). OC shows a robust relationship with EC ( $R^2 = 0.9$ ,  $p < 0.01$ ), which underlines the significant contribution of fuel burning to OC, since EC is only released by inefficient combustion (Liu et al., 2014a). In this study, EC peaked at 17:00 on 21 Jan, and 20:00 on 24 Jan, implying intensive fuel burning at those times. OC ranged from 5.5 to  $45.8 \mu\text{g m}^{-3}$  and EC ranged from 0.6 to  $20.1 \mu\text{g m}^{-3}$ . The relative standard deviation was used to represent the variation of OC (44%) and EC (53%), suggesting that EC had a larger certainty than OC. It indicates that EC came from a variety of combustion sources which were dynamic and unstable. The variation of OC and EC over time led to the significant changes of PM<sub>2.5</sub> levels.

The OC/EC ratios varied from 2.0 to 7.2, with a mean value of  $3.1 \pm 0.7$ . The OC/EC ratio is usually used as the indicator of secondary organic carbon (Hou et al., 2011; Zeng and Wang, 2011). According to the temporal variation of the OC/EC ratio in Fig. 1, the impact of secondary organic carbon varied in different stage of the pollution episode. The OC/EC ratio variation range was 2.0-7.2 when the atmosphere was cleaner. As the pollution got more severe over time, it shrank to 2.0-4.0 after 16 Jan, indicating that the secondary sources had a relatively stable but still considerable impact on PM<sub>2.5</sub> at the polluted stage. According to the previous studies, secondary organic aerosol (SOA) usually played an important role in the wintertime air pollution (Huang et al., 2014; Sun et al., 2013).

Temporal variations of WSOC concentration and WSOC/OC ratio are illustrated in Fig. 1. The average concentration of WSOC in the event was  $9.7 \pm 4.3 \mu\text{g m}^{-3}$  and WSOC varied from 2.2 to  $23.2 \mu\text{g m}^{-3}$ . WSOC was in a higher level in this pollution episode than in the episodes reported by Du et al. (2014b). It was reported that WSOC was abundant in biomass burning emissions in previous studies (Jaffrezzo et al., 2005; Park and Cho, 2011). In addition, a strong correlation was also found between OC and WSOC ( $R^2 > 0.7$ ,  $p < 0.01$ ) and WSOC/OC mass ratio was averaged to be 0.5, a value being consistent with that of another study (Bikkina, 2014). If a major portion of OC was derived from combustion, WSOC could be very likely released from fuel burning. Moreover, WSOC is an important form of BrC, which is able to absorb light radiation. It seems that biomass burning can emit BrC, increasing the light-absorbing capacity of aerosols.

### 3.2 Chemical species related to fossil fuel combustion

To explore the combustion sources, the roles of traffic and industrial emissions, which are main fossil fuel combustion sources in the urban area (Cao et al., 2005), were first investigated. Nitrogen dioxide ( $\text{NO}_2$ ) is the main chemical component in motor vehicle exhaust (Kendrick et al., 2015), and sulfur dioxide ( $\text{SO}_2$ ) is usually treated as the tracer for coal combustion widely existing in industrial activities (Akimoto and Narita, 1994). Therefore, the sum of  $\text{NO}_2$  and  $\text{SO}_2$  concentration can represent the contribution of fossil fuel combustion to the atmospheric pollutants. As shown in Fig. 2, carbon monoxide ( $\text{CO}$ ) and the sum of  $\text{NO}_2$  and  $\text{SO}_2$  concentrations have a positive correlation, but with a low correlation coefficient ( $R^2 = 0.40$ ,  $p < 0.01$ ). The same pattern is also shown between EC and sum of nitrate ( $\text{NO}_3^-$ ) and sulfate ( $\text{SO}_4^{2-}$ ) in  $\text{PM}_{2.5}$  ( $R^2 = 0.46$ ,  $p < 0.01$ ). These patterns suggest that fossil fuel was not the only main type of fuel and that biomass fuel might have been burned during the episode.

### 3.3 Biomass burning tracers

Tracers of biomass burning have been introduced to describe the role of biomass burning in this event. As shown in Fig. 3, all tracers strongly correlate with each other ( $R^2 > 0.60$ ,  $p < 0.01$ ). But there is a more significant correlation between anhydrosugars ( $R^2 > 0.75$ ,  $p < 0.01$ ) than that between  $\text{nss-K}^+$  and anhydrosugars ( $0.61 \leq R^2 \leq 0.67$ ,  $p < 0.01$ ). Because of the non-unique origin of potassium,  $\text{nss-K}^+$  seems a weak tracer of biomass burning, in agreement with other published results.  $\text{K}^+$  has additional significant sources other than biomass burning, such as seawater, soil resuspension and fertilizers (Urban et al., 2012). Furthermore,  $\text{K}^+$  is abundant in firework aerosols according to several recent studies (Cheng et al., 2013; Drewnick et al., 2006). Among all three types of anhydrosugars, levoglucosan was treated as the main tracer in this study because of its larger quantity in  $\text{PM}_{2.5}$  than the other two.

Time series plots of  $\text{nss-K}^+$ , levoglucosan, mannosan and galactosan in  $\text{PM}_{2.5}$  are shown in Fig. 1. In this study,  $\text{nss-K}^+$  varied from 0.2 to 3.8  $\mu\text{g m}^{-3}$ , with a mean level of  $1.2 \pm 0.7 \mu\text{g m}^{-3}$ . A consistent trend between  $\text{nss-K}^+$  and EC can be seen in Fig. 1, especially with both peaks of EC and  $\text{nss-K}^+$  during 14:00-17:00 on 21 Jan (15.7 and 3.8  $\mu\text{g m}^{-3}$ ) and during 17:00-20:00 on 24 Jan (20.1 and 3.5  $\mu\text{g m}^{-3}$ ), suggesting that the intensities of total fuel combustion and biomass fuel combustion changed synchronously.

The average concentration of levoglucosan in  $\text{PM}_{2.5}$  was  $373 \pm 268 \text{ ng m}^{-3}$ , which was significantly higher than those observed in other areas, for example, at coastal sites in Europe (Puxbaum et al., 2007), at forest sites in eastern China (Wang et al., 2008), and at an urban site in Shanghai, China (Li et al., 2016c), but was lower than those measured at an urban site in Beijing during winter and a biomass burning episode of summer (Cheng et al., 2013)(Table 2).

The concentration range of levoglucosan in  $\text{PM}_{2.5}$  of our study was 22.4-1476  $\text{ng m}^{-3}$ . The maximum value approximately approached that observed in Shanghai in the autumn when biomass burning prevailed (1606  $\text{ng m}^{-3}$ , Table 2). The highest level of levoglucosan appeared during 05:00-08:00 on Jan 25, implying that the strongest biomass fuel combustion occurred in this period. Remarkably, levoglucosan concentration presented a valley during 11:00-14:00 on 19 Jan, when EC presenting a peak.

It can be explained that the intense combustion at that time was not dominated by biomass burning. The discrepancy of time distribution between nss-K<sup>+</sup> and levoglucosan were again attributed to the diversity of origins of potassium.

The concentrations of mannosan and galactosan in PM<sub>2.5</sub> were averaged  $18.5 \pm 12.5 \text{ ng m}^{-3}$  and  $9.9 \pm 6.7 \text{ ng m}^{-3}$ , with ranges of 2.1-56.2 ng m<sup>-3</sup> and 1.4-32.2 ng m<sup>-3</sup>, respectively. The trend of mannosan, galactosan and levoglucosan were closely matched, as illustrated in Fig. 1. They reached their highest and second highest levels together, which highlighted the fact that biomass burning heavily impacted the compositions of aerosols in these two periods.

### 3.4 Biomass burning contribution to carbonaceous components

Figure 4 shows the correlations between carbonaceous components (OC, EC or WSOC) and biomass burning tracers (levoglucosan, mannosan, galactosan or nss-K<sup>+</sup>). All biomass burning tracers are associated with EC ( $0.40 < R^2 < 0.80$ ,  $p < 0.01$ ), which demonstrates the conjecture that biomass burning was one of the main types of combustion. Moreover, biomass burning tracers exhibit strong correlations with OC and WSOC ( $0.40 < R^2 < 0.80$ ,  $p < 0.01$ ), indicating that biomass burning might have contributed to organic carbon including WSOC. For each tracer, the higher coefficient of determination ( $R^2$ ) for OC than EC illustrates that the biomass burning impacts on OC were more significant than those on EC. Notably, the slopes and the intercepts of the trend line for WSOC are both about half of those for OC, in accordance with results shown in Sect. 3.1 that WSOC accounted for around 50 % of OC. As a consequence, biomass burning made a stable contribution to WSOC and the contribution was even larger than that to EC in this episode.

The contribution of biomass burning to OC in PM<sub>2.5</sub> (BB-OC) was calculated using Eq. (6):

$$BB - OC = \frac{(lev/(1000 \times OC))_{ambient}}{0.082} \times 100 \%, lev: ng m^{-3}; OC: \mu g m^{-3}, \quad (6)$$

(Zhang et al., 2010; Puxbaum et al., 2007; Zdráhal et al., 2002; Sang et al., 2011). In biomass burning source emission tests for three major types of cereal straw (corn, wheat, and rice) in China, 0.082 was reported as the lev/OC ratio for PM<sub>2.5</sub> (Zhang et al., 2007). This value can be used in combination with the lev/OC ratios of our PM<sub>2.5</sub> samples to roughly estimate the contribution of biomass burning smoke to the ambient OC. The reason why we used the ratio lev/OC associated with cereal straw burning will be explained in Sect. 3.5. BB-OC ranged from 0.2 % to 53.6 % in this event, with an average of  $20.9 \pm 9.3$  %. Our calculated biomass burning contribution has a greater span than that of Beijing rural area (18–38 %) which was computed with the same lev/OC ratio (Zhang et al., 2008a; Zhang et al., 2008b), even though January was not in a common biomass burning prevailing season of Nanjing.

The contribution from biomass burning to the WSOC in PM<sub>2.5</sub> (BB-WSOC) trend in Fig. 5 makes the above analysis more convincing due to the consistency of the contributions computed by two different methods. BB-WSOC was estimated with Eq. (7):

$$BB - WSOC = \frac{(lev/WSOC)_{ambient}}{0.17} \times 100 \%, lev/WSOC: \mu g \mu g C^{-1}, \quad (7)$$

which used a lev/WSOC ratio of 0.17  $\mu g \mu g C^{-1}$  from the test burns of rice straws and wheat straw (Yan et al., 2015). BB-WSOC ranged from 1.1 % to 55.4 %, with an average of  $22.3 \pm 9.9$  %. It was at an equivalent level with that investigated in

Beijing wintertime where BB-WSOC was averaged at  $23 \pm 7 \%$  (Yan et al., 2015), and had a pretty large span. BB-WSOC exhibits a similar trend with BB-OC (Fig. 5). The robust relationship between BB-OC and BB-WSOC ( $R^2 = 0.81$ ,  $p < 0.01$ ) with a regression slope close to 1 (0.96) confirms the reliability of our biomass burning contribution quantification. However, biomass burning contribution here could be related with both local emissions and long-range transport. The origins of biomass burning will be discussed in the following section.

### 3.5 Origin of biomass burning

#### 3.5.1 Major fuel types of biomass burning

The biomass burning characteristics, expressed in the parameter space of lev/man and lev/nss- $K^+$  in Fig. 6, are used to differentiate the burning substrates. The ratio space for needle, duff, hardwood, softwood and crop residuals was introduced from work of Cheng et al. (2013), which overcomes the limitation of using only one characteristic ratio (either lev/nss- $K^+$  or lev/man) to distinguish types of biomass being burned and hence increases the reliability of determination. In previous studies, emissions from the crop residuals burning were characterized by a lower lev/nss- $K^+$  ratio (mostly less than 1) (Sheesley et al., 2003; Sullivan et al., 2008; Engling et al., 2009; Oanh et al., 2011) and a higher lev/man ratio which was reported  $\sim 20$  in general and could be as high as 41 (Sheesley et al., 2003; Sullivan et al., 2008; Engling et al., 2009; Oanh et al., 2011). In the present study, the mean lev/man ratio is  $22.5 \pm 12.3$  and the mean lev/nss- $K^+$  is  $0.3 \pm 1.2$ . According to Fig. 6,  $\sim 94 \%$  of the ambient samples (96 out of 102) in this study are traced to crop residuals & grass region, demonstrating that crop residuals were main biomass type burned in the investigated episode, since the contribution of grass was negligible compared to the total biomass consumed in China (Streets et al., 2003). Our result is similar to that reported for the typical biomass burning events in summer in Beijing (Cheng et al., 2013).

#### 3.5.2 Long-range transport

In order to examine the influence of long-range transport on local atmospheric compositions, 48 h backward trajectories of air masses reaching the Nanjing sites at a height of 500 m were computed via the HYSPLIT model covering all the sampling days. Figure 7 displays the MODIS fire spot distribution during 21 Jan to 25 Jan, when open burning was strong in China. No fire signals were found in the local region of Nanjing, suggesting the dominant influence from long-range transport. Some fire spots appeared in northern China but densely distributed spots were in southeastern China. All 48 h backward air mass trajectories were classified into 4 clusters and mean levoglucosan concentrations of all trajectories for each cluster are described in Fig. 7. The cluster originating from southeastern China had the highest mean levoglucosan concentration ( $796 \text{ ng m}^{-3}$ ) among the four clusters, although it transported the least air mass to Nanjing (20 %). Moreover, when the maximum levoglucosan was observed between 05:00 and 08:00 on 25 Jan, the FLEXPART potential emission sensitivity in Fig. 8 indicates that a notable fraction of air masses was coming from a region in the south and southeast of Nanjing. It is evident that air masses caught the pollutants emitted from biomass burning on 21-24 Jan, as was illustrated by the hotspots. Therefore, the biomass burning emissions from southeastern China profoundly impacted the aerosols in Nanjing during the episode.

In addition, there was a notable cluster originating from the coastal site of eastern China and mainly passing through Shanghai and Jiangsu, where no fire signals were found. But this cluster had a relatively high mean levoglucosan concentration ( $673 \text{ ng m}^{-3}$ ). According to the research by Zhou et al. (2017) on the biomass burning emission inventory, domestic straw burning was responsible for  $\sim 42\%$  of total biomass burning in China in 2012, and  $\sim 1.5 \text{ Gg}$  and  $\sim 80 \text{ Gg PM}_{2.5}$  came from domestic burning in Shanghai and Jiangsu, respectively. It illustrated the significant impact of indoor biomass burning which was invisible in MODIS fire spots map. Therefore, the levoglucosan enrichment of the cluster from coastal area might be due to domestic biomass burning. The air mass frequency of this cluster was  $32.5\%$ , the largest one among that for all clusters, which means domestic biomass burning in the eastern China much influenced aerosols in Nanjing. Local domestic biomass burning should be taken as an important factor to study aerosols of eastern China in further study, even though open biomass burning from long-range transport played a significant role in this study.

### 3.6 Light-absorbing property

The light absorption coefficient of WSOC at  $365 \text{ nm}$  is used to represent water-soluble BrC, which is organic carbon with a capacity of absorbing radiation (Yan et al., 2015; Hecobian et al., 2010; Wang et al., 2018a). The mean  $b_{\text{abs}}$  value was  $9.4 \pm 4.8 \text{ M m}^{-1}$ , higher than the summertime value but lower than the wintertime value in Beijing and Guangzhou (Yan et al., 2015; Qin et al., 2018). Meanwhile, it has a large span from  $1.6$  to  $30.0 \text{ M m}^{-1}$ , partially attributed to its dependence on biomass burning intensity. As shown in Fig. 9,  $b_{\text{abs}}$  is significantly correlated with biomass burning tracers ( $R^2 > 0.5$ ,  $p < 0.01$ ), indicating that a considerable quantity of BrC was associated with biomass burning emissions in this episode. According to the analysis in Sect. 3.4, the robust correlations between WSOC and biomass burning tracers (levoglucosan, mannosan, galactosan or  $\text{nss-K}^+$ ) implied that biomass burning has contributed to WSOC. With respect to this point, the correlation between  $b_{\text{abs}}$  and WSOC ( $R^2 = 0.76$ ,  $P < 0.01$ ) and that between  $b_{\text{abs}}$  and WSOC from biomass burning, calculated with WSOC multiplied by BB-WSOC fraction ( $R^2 = 0.55$ ,  $P < 0.01$ ), are presented in Fig. 10. Both correlations are significantly positive at  $1\%$  possibility level. But  $b_{\text{abs}}$  has a relatively higher  $R^2$  with WSOC than WSOC from BB, indicating that other sources also contributed to water-soluble BrC in the episode. Other researchers pointed out that secondary photochemical reactions in the atmosphere can produce water-soluble BrC as well (Sareen et al., 2013; Liu et al., 2016).

It is evident that the absorption coefficient of WSOC shows a relationship with wavelength, which can be described by absorption Angstrom exponent. AAE is also used to distinguish the BrC emission types due to its dependence on particle size and composition. Generally, the Angstrom exponent for compounds from biomass burning and biofuel emissions is larger than 6 (Hoffer et al., 2006; Chen and Bond, 2010; Hecobian et al., 2010; Bikkina, 2014). The average AAE in this study was  $6.6 \pm 1.3$ , ranging from  $4.1$  to  $10.3$ , with more than  $68\%$  of samples (71 out of 104) having an AAE above 6 (Fig. 13). Our result is consistent with those for the Indo-Gangetic Plain, where biomass burning emission has been proved as the predominant aerosol source (Bikkina, 2014). If light absorption is dominated by elemental carbon, AAE is reported to be  $\sim 1$  (Bond, 2001; Kirchstetter et al., 2004). For fresh and aged SOA it should be  $\sim 7$  and  $\sim 4.7$ , respectively (Bones et al., 2010).

Mass absorption efficiency characterizes the efficiency of light absorption by WSOC. As shown in Fig. 11, the average MAE in this study was  $1.0 \pm 0.2 \text{ m}^2 \text{ g}^{-1}$ , with a range of  $0.5$ - $1.6$ , higher than that of some US cities, Beijing (summer) and the Indo-

Gangetic Plain effected by biomass burning, but lower than that reported for some Indian areas and Beijing, China during wintertime. The MAE was lower than  $1.79 \text{ m}^2 \text{ g}^{-1}$  in Beijing during winter. As shown in Fig. 11, MAE has poor correlation with AAE (Yan et al., 2015; Kirillova et al., 2014b; Kim et al., 2016; Du et al., 2014a; Hecobian et al., 2010; Yan et al., 2017; Cheng et al., 2011; Zhang et al., 2013; Bikkina, 2014; Srinivas et al., 2016; Cheng et al., 2016).

5 As shown in Fig. 13, solar energy absorption of WSOC ( $E_{\text{WSOC}}$ ) in short wavelengths (300-400 nm) had a mean value of  $0.8 \pm 0.4 \text{ W m}^{-2}$ , ranging from 0.2 to  $2.3 \text{ W m}^{-2}$ . The counterpart contributed by biomass burning ( $E_{\text{WSOC\_BB}}$ ), derived from multiplying  $E_{\text{WSOC}}$  by BB-WSOC, had a mean value of  $0.2 \pm 0.1 \text{ W m}^{-2}$ , ranging from 0.0 to  $0.9 \text{ W m}^{-2}$ . Solar energy absorption of EC ( $E_{\text{EC}}$ ) in the wavelength range of 300-400 nm had a mean value of  $3.4 \pm 1.7 \text{ W m}^{-2}$ , ranging from 0.4 to  $9.9 \text{ W m}^{-2}$ . The WSOC to EC absorption percentage ( $E_{\text{WSOC}}/E_{\text{EC}}$ ) was  $23.8 \pm 8.7\%$  and could be up to 73.0% at the short wavelengths (300-  
10 400 nm), which is much higher than that for Beijing winter (42%) (Yan et al., 2015). The map in Fig. 12 specifies the level of PSCF values related to the carbonaceous compounds (levoglucosan, WSOC and EC) and their radiative absorption properties ( $b_{\text{abs}}$ ,  $E_{\text{WSOC}}$ ,  $E_{\text{EC}}$ ,  $E_{\text{WSOC}}/E_{\text{EC}}$ ) in terms of a colour bar. The areas with high PSCF values were interpreted as the potential areas loading the carbonaceous compounds or better light absorption. As shown in Fig.12, the water-soluble carbonaceous aerosols transported to Nanjing over a long distance had a stronger light absorption capacity, compared to those aerosols from local  
15 emissions. It is evident that WSOC would enhance its light absorption capacity after aging along the long-range air mass transport and the enhancement is much more than that for EC (Kirillova et al., 2014a). It means that the carbonaceous emissions over long-range transport can make more contribution to affect the local atmospheric solar radiation balance. In addition, the levoglucosan has a similar PSCF distribution with WSOC and EC, illustrating that long-range transported biomass burning emission profoundly impacted the carbonaceous aerosols in Nanjing during this episode. The similar PSCF distributions  
20 between WSOC and  $b_{\text{abs}}$  or  $E_{\text{WSOC}}$  can be explained by the fact that light-absorption of WSOC is usually related to WSOC levels. The similarity of PSCF distributions between EC and  $E_{\text{EC}}$  can be explained in the same way. However, the PSCF distribution of  $E_{\text{WSOC}}/E_{\text{EC}}$  is different from  $E_{\text{EC}}$  or  $E_{\text{WSOC}}$  in Fig. 12, indicating southeastern China was the potential areas loading the aerosols with a higher light-absorbing contribution by WSOC. It is consistent with the fire spot distribution in Fig. 7, which implies that the long-range transported biomass burning emission significantly impacted the solar energy absorption  
25 of carbonaceous aerosols in Nanjing during this episode.

In Table 3, we show the optical properties ( $\text{MAE}^*$ ,  $\text{SSA}^*$  and  $g^*$ ) for EC and WSOC (at  $\text{RH}=0.7$ ) in the band 26 ( $22650\text{-}29000 \text{ cm}^{-1}$ , 345-442 nm) as provided in RRTMG\_SW model. Based on the surface mass concentration of EC and WSOC measured in this study, RRTMG\_SW simulated the respective absorptive properties in the first layer of the model (the lowest layer above the ground), which accounts for the aerosol absorption in the radiative transfer calculation. To obtain the absorptive radiative  
30 forcing (ARF) of EC or WSOC, RRTMG\_SW was run twice by including and excluding EC or WSOC in the model. The differences in the radiative flux between the two runs indicate the adsorptive radiative effect of EC or WSOC in the atmosphere. In the wavelength range of 345-442 nm, the change in the net flux at the surface caused by absorption of EC and WSOC was  $-3.4 \pm 1.6$  and  $-1.4 \pm 0.6 \text{ W m}^{-2}$  respectively, which are consistent to the previously estimated  $E_{\text{EC}}$  and  $E_{\text{WSOC}}$ . The ARF at the top of the atmosphere (TOA) was  $0.8 \pm 0.4 \text{ W m}^{-2}$  for EC and  $-0.2 \pm 0.1 \text{ W m}^{-2}$  for WSOC. Therefore, the ARF in the  
35 atmosphere (ATM) caused by absorption of EC ( $E_{\text{EC}}^*$ ) and WSOC ( $E_{\text{WSOC}}^*$ ) was  $4.2 \pm 2.0 \text{ W m}^{-2}$  and  $1.2 \pm 0.5 \text{ W m}^{-2}$ ,

respectively, which are slightly higher than the previously estimated  $E_{EC}$  and  $E_{WSOC}$  indicating that the absorbing aerosols maintain a part of the solar energy in the atmosphere. Our estimates from model indicate that the absorption ability of WSOC was equivalent to about 30% of EC absorption in this study, which is comparable to the ratio from previous studies. For example, Lin et al.(2014) simulated the global OC radiative forcing and indicated that the absorption due to OC (both primary and secondary OC) aerosols is about 27-70% of EC warming effect in the global atmosphere. Liu et al. (2014b;2015) investigated the absorption of OC aerosols at different altitudes over the North American continent and found that OC absorption at TOA is around 20% of EC direct effect in the background troposphere. Our study provides an additional evidence and stresses the necessity to account for the absorption capacity of WSOC in model simulations of the global energy budget.

#### 4. Conclusions

10 In this study, biomass burning tracers (including levoglucosan, mannosan, galactosan and nss- $K^+$ ) were used to quantify biomass burning contributions to the carbonaceous components of  $PM_{2.5}$  in Nanjing during a wintertime pollution event. The origin of biomass burning and biomass fuel types were also investigated. Furthermore, solar energy absorption due to biomass burning BrC was quantified.

15 The levoglucosan concentration in  $PM_{2.5}$  in this study was up to  $1476 \text{ ng m}^{-3}$ , which is extremely higher in comparison with those found in other studies. Biomass burning contribution to OC and WSOC was, on average,  $20.9 \pm 9.3 \%$  and  $22.3 \pm 9.9 \%$ , respectively, and was as high as  $53.6 \%$  to OC and  $55.4 \%$  to WSOC. Both of the facts indicate the significant impact of biomass burning in this atmospheric pollution episode, although no local open biomass burning was found during the study period. The combination of long-range transport analysis, fire spots information and the potential emission sensitivity of BC suggests that the burning of crop residuals in southeastern China was responsible for the significant biomass combustion to the ambient aerosols.

20 The mass absorption efficiency of water-soluble BrC at the 365 nm wavelength was averaged  $1.0 \pm 0.2 \text{ m}^2 \text{ g}^{-1}$ , with a range from  $0.5$  to  $1.6 \text{ m}^2 \text{ g}^{-1}$ . Based on the measured light-absorbing properties, solar energy absorption of WSOC and EC in short wavelengths (300-400 nm) was calculated to be  $0.8 \pm 0.4 \text{ W m}^{-2}$  and  $3.4 \pm 1.7 \text{ W m}^{-2}$ , respectively, which were slightly lower than  $1.2 \pm 0.5 \text{ W m}^{-2}$  for WSOC and  $4.2 \pm 2.0 \text{ W m}^{-2}$  for EC, the results simulated by a radiative transfer model (RRTMG\_SW). The maximum solar energy absorption of WSOC due to biomass burning was  $0.9 \text{ W m}^{-2}$ . It provides the evidence that carbonaceous components released by biomass burning transported over long distance absorbed solar energy, especially in the UV band, influencing the radiation balance of the atmosphere. The PSCF analysis of carbonaceous compounds concentration and light-absorption of carbonaceous aerosols show that the regional transported biomass burning emissions profoundly impacted the chemical and optical properties of carbonaceous aerosols in Nanjing during this episode.

30 *Author contributions.* XL and YZ conceived the study. XL wrote the manuscript with YP, LX and CZ. XL, XZ, TH and ZX carried out the experiments and collected data. All have contributed to the data interpretation and review of the manuscript.

*Competing interests.* The authors declare that they have no conflict of interest.

*Acknowledgements.* This study was financially supported by the National Key R&D Program of China (Grant No. 2017YFC0210101), the Natural Scientific Foundation of China (No. 91643109 and 41603104), the Provincial Natural Science Foundation of Jiangsu (Grant No. BK20180040) and China Scholarship Council.

## References

- 5 Akimoto, H., and Narita, H.: Distribution of SO<sub>2</sub>, NO<sub>x</sub> and CO<sub>2</sub> emissions from fuel combustion and industrial activities in Asia with 1° × 1° resolution, *Atmospheric Environment*, 28, 213-225, [https://doi.org/10.1016/1352-2310\(94\)90096-5](https://doi.org/10.1016/1352-2310(94)90096-5), 1994.
- Alexander, D. T. L., Crozier, P. A., and Anderson, J. R.: Brown Carbon Spheres in East Asian Outflow and Their Optical Properties, *Science*, 321, 833, 2008.
- 10 Ancellet, G., Pelon, J., Totems, J., Chazette, P., Bazureau, A., Sicard, M., Di Iorio, T., Dulac, F., and Mallet, M.: Long-range transport and mixing of aerosol sources during the 2013 North American biomass burning episode: analysis of multiple lidar observations in the western Mediterranean basin, *Atmospheric Chemistry and Physics*, 16, 4725-4742, 10.5194/acp-16-4725-2016, 2016.
- Andreae, M. O., and Gelencsér, A.: Black carbon or brown carbon? The nature of light-absorbing carbonaceous aerosols, *Atmos. Chem. Phys.*, 6, 3131-3148, 10.5194/acp-6-3131-2006, 2006.
- 15 Aouizerats, B., van der Werf, G. R., Balasubramanian, R., and Betha, R.: Importance of transboundary transport of biomass burning emissions to regional air quality in Southeast Asia during a high fire event, *Atmospheric Chemistry and Physics*, 15, 363-373, 10.5194/acp-15-363-2015, 2015.
- Bao, M., Cao, F., Chang, Y., Zhang, Y.-L., Gao, Y., Liu, X., Zhang, Y., Zhang, W., Tang, T., Xu, Z., Liu, S., Lee, X., Li, J., and Zhang, G.: Characteristics and origins of air pollutants and carbonaceous aerosols during wintertime haze episodes at a rural site in the Yangtze River Delta, China, *Atmospheric Pollution Research*, 8, 900-911, <https://doi.org/10.1016/j.apr.2017.03.001>, 2017.
- 20 Bikkina, S.: Brown carbon in atmospheric outflow from the Indo-Gangetic Plain: Mass absorption efficiency and temporal variability, 2014.
- Bohren, C. F., and Huffman, D. R.: Absorption and scattering of light by small particles, in, Wiley-Inter-science Publication, 181-185, 1998.
- 25 Bond, T. C.: Spectral dependence of visible light absorption by carbonaceous particles emitted from coal combustion, *Geophysical Research Letters*, 28, 4075-4078, 10.1029/2001GL013652, 2001.
- Bond, T. C., and Bergstrom, R. W.: Light Absorption by Carbonaceous Particles: An Investigative Review, *Aerosol Science and Technology*, 40, 27-67, 10.1080/02786820500421521, 2006.
- 30 Bones, D. L., Henricksen, D. K., Mang, S. A., Gonsior, M., Bateman, A. P., Nguyen, T. B., Cooper, W. J., and Nizkorodov, S. A.: Appearance of strong absorbers and fluorophores in limonene-O<sub>3</sub> secondary organic aerosol due to NH<sub>4</sub><sup>+</sup>-mediated chemical aging over long time scales, *Journal of Geophysical Research: Atmospheres*, 115, n/a-n/a, 10.1029/2009JD012864, 2010.
- 35 Bosch, C., Andersson, A., Kirillova, E. N., Budhavant, K., Tiwari, S., Praveen, P. S., Russell, L. M., Beres, N. D., Ramanathan, V., and Gustafsson, Ö.: Source-diagnostic dual-isotope composition and optical properties of water-soluble organic carbon and elemental carbon in the South Asian outflow intercepted over the Indian Ocean, *Journal of Geophysical Research: Atmospheres*, 119, 7117-7131, 10.1002/2014JD022127, 2014.
- Cao, F., Zhang, S.-C., Kawamura, K., and Zhang, Y.-L.: Inorganic markers, carbonaceous components and stable carbon isotope from biomass burning aerosols in Northeast China, *Science of The Total Environment*, 572, 1244-1251, <https://doi.org/10.1016/j.scitotenv.2015.09.099>, 2016.
- 40 Cao, J. J., Wu, F., Chow, J. C., Lee, S. C., Li, Y., Chen, S. W., An, Z. S., Fung, K. K., Watson, J. G., Zhu, C. S., and Liu, S. X.: Characterization and source apportionment of atmospheric organic and elemental carbon during fall and winter of 2003 in Xi'an, China, *Atmos. Chem. Phys.*, 5, 3127-3137, 10.5194/acp-5-3127-2005, 2005.
- 45 Chakrabarty, R. K., Gyawali, M., Yatavelli, R. L. N., Pandey, A., Watts, A. C., Knue, J., Chen, L. W. A., Pattison, R. R., Tsiabart, A., Samburova, V., and Moosmüller, H.: Brown carbon aerosols from burning of boreal peatlands: microphysical properties, emission factors, and implications for direct radiative forcing, *Atmos. Chem. Phys.*, 16, 3033-3040, 10.5194/acp-16-3033-2016, 2016.



- Chen, D., Cui, H., Zhao, Y., Yin, L., Lu, Y., and Wang, Q.: A two-year study of carbonaceous aerosols in ambient PM<sub>2.5</sub> at a regional background site for western Yangtze River Delta, China, *Atmospheric Research*, 183, 351-361, 10.1016/j.atmosres.2016.09.004, 2017a.
- Chen, J., Li, C., Ristovski, Z., Milic, A., Gu, Y., Islam, M. S., Wang, S., Hao, J., Zhang, H., He, C., Guo, H., Fu, H., Miljevic, B., Morawska, L., Thai, P., Lam, Y. F., Pereira, G., Ding, A., Huang, X., and Dumka, U. C.: A review of biomass burning: Emissions and impacts on air quality, health and climate in China, *Science of The Total Environment*, 579, 1000-1034, <https://doi.org/10.1016/j.scitotenv.2016.11.025>, 2017b.
- Chen, Y., and Bond, T. C.: Light absorption by organic carbon from wood combustion, *Atmos. Chem. Phys.*, 10, 1773-1787, 10.5194/acp-10-1773-2010, 2010.
- Cheng, Y., He, K. B., Zheng, M., Duan, F. K., Du, Z. Y., Ma, Y. L., Tan, J. H., Yang, F. M., Liu, J. M., Zhang, X. L., Weber, R. J., Bergin, M. H., and Russell, A. G.: Mass absorption efficiency of elemental carbon and water-soluble organic carbon in Beijing, China, *Atmos. Chem. Phys.*, 11, 11497-11510, 10.5194/acp-11-11497-2011, 2011.
- Cheng, Y., Engling, G., B. He, K., K. Duan, F., L. Ma, Y., Y. Du, Z., Liu, J., Zheng, M., and J. Weber, R.: Biomass burning contribution to Beijing aerosol, 2013.
- Cheng, Y., He, K.-b., Du, Z.-y., Engling, G., Liu, J.-m., Ma, Y.-l., Zheng, M., and Weber, R. J.: The characteristics of brown carbon aerosol during winter in Beijing, *Atmospheric Environment*, 127, 355-364, <https://doi.org/10.1016/j.atmosenv.2015.12.035>, 2016.
- Cheng, Z., Wang, S., Fu, X., Watson, J. G., Jiang, J., Fu, Q., Chen, C., Xu, B., Yu, J., Chow, J. C., and Hao, J.: Impact of biomass burning on haze pollution in the Yangtze River delta, China: a case study in summer 2011, *Atmos. Chem. Phys.*, 14, 4573-4585, 10.5194/acp-14-4573-2014, 2014.
- Choudhary, V., Rajput, P., Singh, D. K., Singh, A. K., and Gupta, T.: Light absorption characteristics of brown carbon during foggy and non-foggy episodes over the Indo-Gangetic Plain, *Atmospheric Pollution Research*, <https://doi.org/10.1016/j.apr.2017.11.012>, 2017.
- Drewnick, F., Hings, S. S., Curtius, J., Eerdekens, G., and Williams, J.: Measurement of fine particulate and gas-phase species during the New Year's fireworks 2005 in Mainz, Germany, *Atmospheric Environment*, 40, 4316-4327, <https://doi.org/10.1016/j.atmosenv.2006.03.040>, 2006.
- Du, Z., He, K., Cheng, Y., Duan, F., Ma, Y., Liu, J., Zhang, X., Zheng, M., and Weber, R.: A yearlong study of water-soluble organic carbon in Beijing II: Light absorption properties, *Atmospheric Environment*, 89, 235-241, <https://doi.org/10.1016/j.atmosenv.2014.02.022>, 2014a.
- Du, Z., He, K., Cheng, Y., Duan, F., Ma, Y., Liu, J., Zhang, X., Zheng, M., and Weber, R.: A yearlong study of water-soluble organic carbon in Beijing I: Sources and its primary vs. secondary nature, *Atmospheric Environment*, 92, 514-521, <https://doi.org/10.1016/j.atmosenv.2014.04.060>, 2014b.
- Duan, F., Liu, X., Yu, T., and Cachier, H.: Identification and estimate of biomass burning contribution to the urban aerosol organic carbon concentrations in Beijing, *Atmospheric Environment*, 38, 1275-1282, <https://doi.org/10.1016/j.atmosenv.2003.11.037>, 2004.
- Engling, G., Carrico, C. M., Kreidenweis, S. M., Collett, J. L., Day, D. E., Malm, W. C., Lincoln, E., Min Hao, W., Iinuma, Y., and Herrmann, H.: Determination of levoglucosan in biomass combustion aerosol by high-performance anion-exchange chromatography with pulsed amperometric detection, *Atmospheric Environment*, 40, 299-311, <https://doi.org/10.1016/j.atmosenv.2005.12.069>, 2006.
- Engling, G., Lee, J. J., Tsai, Y.-W., Lung, S.-C. C., Chou, C. C. K., and Chan, C.-Y.: Size-Resolved Anhydrosugar Composition in Smoke Aerosol from Controlled Field Burning of Rice Straw, *Aerosol Science and Technology*, 43, 662-672, 10.1080/02786820902825113, 2009.
- Favez, O., El Haddad, I., Piot, C., Boréave, A., Abidi, E., Marchand, N., Jaffrezo, J. L., Besombes, J. L., Personnaz, M. B., Sciare, J., Wortham, H., George, C., and D'Anna, B.: Inter-comparison of source apportionment models for the estimation of wood burning aerosols during wintertime in an Alpine city (Grenoble, France), *Atmos. Chem. Phys.*, 10, 5295-5314, 10.5194/acp-10-5295-2010, 2010.
- Feng, Y., Ramanathan, V., and Kotamarthi, V. R.: Brown carbon: a significant atmospheric absorber of solar radiation?, *Atmos. Chem. Phys.*, 13, 8607-8621, 10.5194/acp-13-8607-2013, 2013.
- Fraser, M. P., and Lakshmanan, K.: Using Levoglucosan as a Molecular Marker for the Long-Range Transport of Biomass Combustion Aerosols, *Environmental Science & Technology*, 34, 4560-4564, 10.1021/es991229I, 2000.

- Gao, S., Hegg, D. A., Hobbs, P. V., Kirchstetter, T. W., Magi, B. I., and Sadilek, M.: Water-soluble organic components in aerosols associated with savanna fires in southern Africa: Identification, evolution, and distribution, *Journal of Geophysical Research: Atmospheres*, 108, n/a-n/a, 10.1029/2002JD002324, 2003.
- García, M. I., van Drooge, B. L., Rodríguez, S., and Alastuey, A.: Speciation of organic aerosols in the Saharan Air Layer and in the free troposphere westerlies, *Atmos. Chem. Phys.*, 17, 8939-8958, 10.5194/acp-17-8939-2017, 2017.
- 5 Gilman, J. B., Lerner, B. M., Kuster, W. C., Goldan, P. D., Warneke, C., Veres, P. R., Roberts, J. M., de Gouw, J. A., Burling, I. R., and Yokelson, R. J.: Biomass burning emissions and potential air quality impacts of volatile organic compounds and other trace gases from fuels common in the US, *Atmospheric Chemistry and Physics*, 15, 13915-13938, 10.5194/acp-15-13915-2015, 2015.
- 10 Graham, B., Guyon, P., Taylor, P. E., Artaxo, P., Maenhaut, W., Glovsky, M. M., Flagan, R. C., and Andreae, M. O.: Organic compounds present in the natural Amazonian aerosol: Characterization by gas chromatography-mass spectrometry, *Journal of Geophysical Research: Atmospheres*, 108, n/a-n/a, 10.1029/2003jd003990, 2003.
- Grythe, H., Kristiansen, N. I., Groot Zwaafink, C. D., Eckhardt, S., Ström, J., Tunved, P., Krejci, R., and Stohl, A.: A new aerosol wet removal scheme for the Lagrangian particle model FLEXPART v10, *Geosci. Model Dev.*, 10, 1447-1466, 10.5194/gmd-10-1447-2017, 2017.
- 15 Hecobian, A., Zhang, X., Zheng, M., Frank, N., Edgerton, E. S., and Weber, R. J.: Water-Soluble Organic Aerosol material and the light-absorption characteristics of aqueous extracts measured over the Southeastern United States, *Atmospheric Chemistry and Physics*, 10, 5965-5977, 10.5194/acp-10-5965-2010, 2010.
- Hess, M., Koepke, P., and Schult, I.: Optical Properties of Aerosols and Clouds: The Software Package OPAC, *Bulletin of the American Meteorological Society*, 79, 831-844, 10.1175/1520-0477(1998)079<0831:OPOAAC>2.0.CO;2, 1998.
- 20 Hoffer, A., Gelencsér, A., Guyon, P., Kiss, G., Schmid, O., Frank, G. P., Artaxo, P., and Andreae, M. O.: Optical properties of humic-like substances (HULIS) in biomass-burning aerosols, *Atmos. Chem. Phys.*, 6, 3563-3570, 10.5194/acp-6-3563-2006, 2006.
- Hou, B., Zhuang, G., Zhang, R., Liu, T., Guo, Z., and Chen, Y.: The implication of carbonaceous aerosol to the formation of haze: Revealed from the characteristics and sources of OC/EC over a mega-city in China, *Journal of Hazardous Materials*, 190, 529-536, <https://doi.org/10.1016/j.jhazmat.2011.03.072>, 2011.
- 25 Huang, R.-J., Zhang, Y., Bozzetti, C., Ho, K.-F., Cao, J.-J., Han, Y., Daellenbach, K. R., Slowik, J. G., Platt, S. M., Canonaco, F., Zotter, P., Wolf, R., Pieber, S. M., Brun, E. A., Crippa, M., Ciarelli, G., Piazzalunga, A., Schwikowski, M., Abbaszade, G., Schnelle-Kreis, J., Zimmermann, R., An, Z., Szidat, S., Baltensperger, U., Haddad, I. E., and Prévôt, A. S. H.: High secondary aerosol contribution to particulate pollution during haze events in China, *Nature*, 514, 218, 10.1038/nature13774, <https://www.nature.com/articles/nature13774#supplementary-information>, 2014.
- Iacono Michael, J., Mlawer Eli, J., Clough Shepard, A., and Morcrette, J. J.: Impact of an improved longwave radiation model, RRTM, on the energy budget and thermodynamic properties of the NCAR community climate model, CCM3, *Journal of Geophysical Research: Atmospheres*, 105, 14873-14890, 10.1029/2000JD900091, 2000.
- 35 Iacono Michael, J., Delamere Jennifer, S., Mlawer Eli, J., Shephard Mark, W., Clough Shepard, A., and Collins William, D.: Radiative forcing by long - lived greenhouse gases: Calculations with the AER radiative transfer models, *Journal of Geophysical Research: Atmospheres*, 113, 10.1029/2008JD009944, 2008.
- Jaffrezo, J. L., Aymoz, G., Delaval, C., and Cozic, J.: Seasonal variations of the water soluble organic carbon mass fraction of aerosol in two valleys of the French Alps, *Atmos. Chem. Phys.*, 5, 2809-2821, 10.5194/acp-5-2809-2005, 2005.
- 40 Jung, C. H., Lee, J. Y., and Kim, Y. P.: Estimation of aerosol optical properties considering hygroscopicity and light absorption, *Atmospheric Environment*, 105, 191-201, <https://doi.org/10.1016/j.atmosenv.2015.01.058>, 2015.
- Jung, J., Lee, S., Kim, H., Kim, D., Lee, H., and Oh, S.: Quantitative determination of the biomass-burning contribution to atmospheric carbonaceous aerosols in Daejeon, Korea, during the rice-harvest period, *Atmospheric Environment*, 89, 642-650, <https://doi.org/10.1016/j.atmosenv.2014.03.010>, 2014.
- 45 Jung, J., Lee, D., Jeong, H., Lee, S., and Oh, S.: Chemical characterization of the long-range transport of firework/firecracker emissions over the Korean Peninsula: A novel indicator of Asian continental outflows, *Atmospheric Environment*, <https://doi.org/10.1016/j.atmosenv.2018.02.013>, 2018.
- Kendrick, C. M., Koonce, P., and George, L. A.: Diurnal and seasonal variations of NO, NO<sub>2</sub> and PM<sub>2.5</sub> mass as a function of traffic volumes alongside an urban arterial, *Atmospheric Environment*, 122, 133-141, <https://doi.org/10.1016/j.atmosenv.2015.09.019>, 2015.
- 50

- Kim, H., Kim, J. Y., Jin, H. C., Lee, J. Y., and Lee, S. P.: Seasonal variations in the light-absorbing properties of water-soluble and insoluble organic aerosols in Seoul, Korea, *Atmospheric Environment*, 129, 234-242, <https://doi.org/10.1016/j.atmosenv.2016.01.042>, 2016.
- Kirchstetter, T. W., Novakov, T., and Hobbs, P. V.: Evidence that the spectral dependence of light absorption by aerosols is affected by organic carbon, *Journal of Geophysical Research: Atmospheres*, 109, n/a-n/a, 10.1029/2004jd004999, 2004.
- 5 Kirillova, E. N., Andersson, A., Han, J., Lee, M., and Gustafsson, Ö.: Sources and light absorption of water-soluble organic carbon aerosols in the outflow from northern China, *Atmos. Chem. Phys.*, 14, 1413-1422, 10.5194/acp-14-1413-2014, 2014a.
- Kirillova, E. N., Andersson, A., Tiwari, S., Srivastava, A. K., Bisht, D. S., and Gustafsson, Ö.: Water-soluble organic carbon aerosols during a full New Delhi winter: Isotope-based source apportionment and optical properties, *Journal of Geophysical Research: Atmospheres*, 119, 3476-3485, 10.1002/2013JD020041, 2014b.
- 10 Lack, D. A., Langridge, J. M., Bahreini, R., Cappa, C. D., Middlebrook, A. M., and Schwarz, J. P.: Brown carbon and internal mixing in biomass burning particles, *Proceedings of the National Academy of Sciences*, 109, 14802, 10.1073/pnas.1206575109, 2012.
- 15 Lai, S.-c., Zou, S.-c., Cao, J.-j., Lee, S.-c., and Ho, K.-f.: Characterizing ionic species in PM2.5 and PM10 in four Pearl River Delta cities, South China, *Journal of Environmental Sciences*, 19, 939-947, [https://doi.org/10.1016/S1001-0742\(07\)60155-7](https://doi.org/10.1016/S1001-0742(07)60155-7), 2007.
- Laskin, A., Laskin, J., and Nizkorodov, S. A.: Chemistry of Atmospheric Brown Carbon, *Chemical Reviews*, 115, 4335-4382, 10.1021/cr5006167, 2015.
- 20 Leithead, A., Li, S. M., Hoff, R., Yu, C., and Brook, J.: Levoglucosan and dehydroabietic acid: Evidence of biomass burning impact on aerosols in the Lower Fraser Valley, *Atmospheric Environment*, 40, 2721-2734, 2006.
- Li, B., Zhang, J., Zhao, Y., Yuan, S., Zhao, Q., Shen, G., and Wu, H.: Seasonal variation of urban carbonaceous aerosols in a typical city Nanjing in Yangtze River Delta, China, *Atmospheric Environment*, 106, 223-231, <https://doi.org/10.1016/j.atmosenv.2015.01.064>, 2015.
- 25 Li, C., Yan, F., Kang, S., Chen, P., Hu, Z., Gao, S., Qu, B., and Sillanpää, M.: Light absorption characteristics of carbonaceous aerosols in two remote stations of the southern fringe of the Tibetan Plateau, China, *Atmospheric Environment*, 143, 79-85, <https://doi.org/10.1016/j.atmosenv.2016.08.042>, 2016a.
- Li, J.: Comments on "On the Choice of Average Solar Zenith Angle", *Journal of the Atmospheric Sciences*, 74, 1669-1676, 10.1175/JAS-D-16-0185.1, 2017.
- 30 Li, K., Liao, H., Mao, Y., and Ridley, D. A.: Source sector and region contributions to concentration and direct radiative forcing of black carbon in China, *Atmospheric Environment*, 124, 351-366, <https://doi.org/10.1016/j.atmosenv.2015.06.014>, 2016b.
- Li, X., Chen, M., Le, H. P., Wang, F., Guo, Z., Iinuma, Y., Chen, J., and Herrmann, H.: Atmospheric outflow of PM2.5 saccharides from megacity Shanghai to East China Sea: Impact of biological and biomass burning sources, *Atmospheric Environment*, 143, 1-14, <https://doi.org/10.1016/j.atmosenv.2016.08.039>, 2016c.
- 35 Lin, G., Penner, J. E., Flanner, M. G., Sillman, S., Xu, L., and Zhou, C.: Radiative forcing of organic aerosol in the atmosphere and on snow: Effects of SOA and brown carbon, *Journal of Geophysical Research: Atmospheres*, 119, 7453-7476, 10.1002/2013JD021186, 2014.
- Liu, J., Li, J., Zhang, Y., Liu, D., Ding, P., Shen, C., Shen, K., He, Q., Ding, X., Wang, X., Chen, D., Szidat, S., and Zhang, G.: Source Apportionment Using Radiocarbon and Organic Tracers for PM2.5 Carbonaceous Aerosols in Guangzhou, South China: Contrasting Local- and Regional-Scale Haze Events, *Environmental Science & Technology*, 48, 12002-12011, 10.1021/es503102w, 2014a.
- 40 Liu, J., Scheuer, E., Dibb, J., Ziemba, L. D., Thornhill, K. L., Anderson, B. E., Wisthaler, A., Mikoviny, T., Devi, J. J., Bergin, M., and Weber, R. J.: Brown carbon in the continental troposphere, *Geophysical Research Letters*, 41, 2191-2195, 10.1002/2013GL058976, 2014b.
- 45 Liu, J., Scheuer, E., Dibb, J., Diskin, G. S., Ziemba, L. D., Thornhill, K. L., Anderson, B. E., Wisthaler, A., Mikoviny, T., Devi, J. J., Bergin, M., Perring, A. E., Markovic, M. Z., Schwarz, J. P., Campuzano-Jost, P., Day, D. A., Jimenez, J. L., and Weber, R. J.: Brown carbon aerosol in the North American continental troposphere: sources, abundance, and radiative forcing, *Atmospheric Chemistry and Physics*, 15, 7841-7858, 10.5194/acp-15-7841-2015, 2015.
- 50 Liu, J., Lin, P., Laskin, A., Laskin, J., Kathmann, S. M., Wise, M., Caylor, R., Imholt, F., Selimovic, V., and Shilling, J. E.: Optical properties and aging of light-absorbing secondary organic aerosol, *Atmospheric Chemistry and Physics*, 16, 12815-12827, 10.5194/acp-16-12815-2016, 2016.

- Mlawer, E. J., and Clough, S. A.: Shortwave and longwave enhancements in the rapid radiative transfer model, Seventh Atmospheric Radiation Measurement (ARM) Science Team Meeting, U.S. Department of Energy, 1998, 499-504.
- Mochida, M., Kawamura, K., Fu, P., and Takemura, T.: Seasonal variation of levoglucosan in aerosols over the western North Pacific and its assessment as a biomass-burning tracer, *Atmospheric Environment*, 44, 3511-3518, <https://doi.org/10.1016/j.atmosenv.2010.06.017>, 2010.
- 5 Moffet, R. C., and Prather, K. A.: In-situ measurements of the mixing state and optical properties of soot with implications for radiative forcing estimates, *Proceedings of the National Academy of Sciences of the United States of America*, 106, 11872-11877, 10.1073/pnas.0900040106, 2009.
- Myhre, G., Shindell, D., Bréon, F.-M., Collins, W., Fuglestad, J., Huang, J., Koch, D., Lamarque, J.-F., Lee, D., Mendoza, B., Nakajima, T., Robock, A., Stephens, G., Takemura, T., and Zhang, H.: Anthropogenic and natural radiative forcing, Cambridge, UK, 659-740, 2013.
- 10 Myhre, G., and Samset, B. H.: Standard climate models radiation codes underestimate black carbon radiative forcing, *Atmos. Chem. Phys.*, 15, 2883-2888, 10.5194/acp-15-2883-2015, 2015.
- Novakov, T., and Corrigan, C. E.: Cloud condensation nucleus activity of the organic component of biomass smoke particles, *Geophysical Research Letters*, 23, 2141-2144, 10.1029/96GL01971, 1996.
- 15 Oanh, N. T. K., Bich, T. L., Tipayarom, D., Manadhar, B. R., Prapat, P., Simpson, C. D., and Liu, L. J. S.: CHARACTERIZATION OF PARTICULATE MATTER EMISSION FROM OPEN BURNING OF RICE STRAW, *Atmospheric environment (Oxford, England : 1994)*, 45, 493-502, 10.1016/j.atmosenv.2010.09.023, 2011.
- Oros, D. R., and Simoneit, B. R. T.: Identification and emission factors of molecular tracers in organic aerosols from biomass burning Part 1. Temperate climate conifers, *Applied Geochemistry*, 16, 1513-1544, [https://doi.org/10.1016/S0883-2927\(01\)00021-X](https://doi.org/10.1016/S0883-2927(01)00021-X), 2001.
- 20 Panicker, A., Aditi, R., Beig, G., Ali, K., and Solmon, F.: Radiative Forcing of Carbonaceous Aerosols over Two Urban Environments in Northern India, 2017.
- Park, S. S., and Cho, S. Y.: Tracking sources and behaviors of water-soluble organic carbon in fine particulate matter measured at an urban site in Korea, *Atmospheric Environment*, 45, 60-72, <https://doi.org/10.1016/j.atmosenv.2010.09.045>, 2011.
- 25 Peng, J., Hu, M., Guo, S., Du, Z., Zheng, J., Shang, D., Levy Zamora, M., Zeng, L., Shao, M., Wu, Y.-S., Zheng, J., Wang, Y., Glen, C. R., Collins, D. R., Molina, M. J., and Zhang, R.: Markedly enhanced absorption and direct radiative forcing of black carbon under polluted urban environments, *Proceedings of the National Academy of Sciences*, 113, 4266, 10.1073/pnas.1602310113, 2016.
- 30 Pruppacher, H. R., and Klett, J. D.: *Microphysics of Clouds and Precipitation*, Second Revised and Enlarged Edition with an Introduction to Cloud Chemistry and Cloud Electricity ed., edited by: Dordrecht, Kluwer Academic Publishers, 1997.
- Puxbaum, H., Caseiro, A., Sánchez-Ochoa, A., Kasper-Giebl, A., Claeys, M., Gelencsér, A., Legrand, M., Preunkert, S., and Pio, C.: Levoglucosan levels at background sites in Europe for assessing the impact of biomass combustion on the European aerosol background, *Journal of Geophysical Research: Atmospheres*, 112, n/a-n/a, 10.1029/2006JD008114, 2007.
- 35 Qin, Y. M., Tan, H. B., Li, Y. J., Li, Z. J., Schurman, M. I., Liu, L., Wu, C., and Chan, C. K.: Chemical characteristics of brown carbon in atmospheric particles at a suburban site near Guangzhou, China, *Atmos. Chem. Phys.*, 18, 16409-16418, 10.5194/acp-18-16409-2018, 2018.
- Ramanathan, V., and Carmichael, G.: Global and regional climate changes due to black carbon, *Nature Geoscience*, 1, 221, 10.1038/ngeo156, 2008.
- 40 Reisen, F., Meyer, C. P., McCaw, L., Powell, J. C., Tolhurst, K., Keywood, M. D., and Gras, J. L.: Impact of smoke from biomass burning on air quality in rural communities in southern Australia, *Atmospheric Environment*, 45, 3944-3953, <https://doi.org/10.1016/j.atmosenv.2011.04.060>, 2011.
- Rogers, C. F., Hudson, J. G., Zielinska, B., Tanner, R. L., Hallett, J., and Watson, J. G.: *Cloud condensation nuclei from biomass burnin*, Massachusetts Inst of Tech Press, United States, 1991.
- 45 Sang, X. F., Chan, C. Y., Engling, G., Chan, L. Y., Wang, X. M., Zhang, Y. N., Si, S., Zhang, Z. S., Zhang, T., and Ming, H.: Levoglucosan enhancement in ambient aerosol during springtime transport events of biomass burning smoke to Southeast China, *Tellus Series B-chemical & Physical Meteorology*, 63, 129-139, 2011.
- Sareen, N., Moussa, S. G., and McNeill, V. F.: Photochemical Aging of Light-Absorbing Secondary Organic Aerosol Material, *The Journal of Physical Chemistry A*, 117, 2987-2996, 10.1021/jp309413j, 2013.
- 50 Seibert, P., and Frank, A.: Source-receptor matrix calculation with a Lagrangian particle dispersion model in backward mode, *Atmospheric Chemistry and Physics*, 4, 51-63, 2004.



- Shamjad, P. M., Tripathi, S. N., Pathak, R., Hallquist, M., Arola, A., and Bergin, M. H.: Contribution of Brown Carbon to Direct Radiative Forcing over the Indo-Gangetic Plain, *Environmental Science & Technology*, 49, 10474-10481, 10.1021/acs.est.5b03368, 2015.
- Shamjad, P. M., Tripathi, S. N., Thamman, N. M., and Vreeland, H.: Refractive Index and Absorption Attribution of Highly Absorbing Brown Carbon Aerosols from an Urban Indian City-Kanpur, *Scientific Reports*, 6, 37735, 10.1038/srep37735 <https://www.nature.com/articles/srep37735#supplementary-information>, 2016.
- Sheesley, R. J., Schauer, J. J., Chowdhury, Z., Cass, G. R., and Simoneit, B. R. T.: Characterization of organic aerosols emitted from the combustion of biomass indigenous to South Asia, *Journal of Geophysical Research: Atmospheres*, 108, n/a-n/a, 10.1029/2002jd002981, 2003.
- Shindell, D., and Faluvegi, G.: Climate response to regional radiative forcing during the twentieth century, *Nature Geoscience*, 2, 294, 10.1038/ngeo473 <https://www.nature.com/articles/ngeo473#supplementary-information>, 2009.
- Simoneit, B. R. T., Schauer, J. J., Nolte, C. G., Oros, D. R., Elias, V. O., Fraser, M. P., Rogge, W. F., and Cass, G. R.: Levoglucosan, a tracer for cellulose in biomass burning and atmospheric particles, *Atmospheric Environment*, 33, 173-182, [https://doi.org/10.1016/S1352-2310\(98\)00145-9](https://doi.org/10.1016/S1352-2310(98)00145-9), 1999.
- Simoneit, B. R. T.: Biomass burning — a review of organic tracers for smoke from incomplete combustion, *Applied Geochemistry*, 17, 129-162, [https://doi.org/10.1016/S0883-2927\(01\)00061-0](https://doi.org/10.1016/S0883-2927(01)00061-0), 2002.
- Simoneit, B. R. T., Elias, V. O., Kobayashi, M., Kawamura, K., Rushdi, A. I., Medeiros, P. M., Rogge, W. F., and Didyk, B. M.: SugarsDominant Water-Soluble Organic Compounds in Soils and Characterization as Tracers in Atmospheric Particulate Matter, *Environmental Science & Technology*, 38, 5939-5949, 10.1021/es0403099, 2004.
- Srinivas, B., Rastogi, N., Sarin, M. M., Singh, A., and Singh, D.: Mass absorption efficiency of light absorbing organic aerosols from source region of paddy-residue burning emissions in the Indo-Gangetic Plain, *Atmospheric Environment*, 125, 360-370, <https://doi.org/10.1016/j.atmosenv.2015.07.017>, 2016.
- Stohl, A., Hittenberger, M., and Wotawa, G.: Validation of the lagrangian particle dispersion model FLEXPART against large-scale tracer experiment data, *Atmospheric Environment*, 32, 4245-4264, [https://doi.org/10.1016/S1352-2310\(98\)00184-8](https://doi.org/10.1016/S1352-2310(98)00184-8), 1998.
- Stohl, A., Forster, C., Frank, A., Seibert, P., and Wotawa, G.: Technical note: The Lagrangian particle dispersion model FLEXPART version 6.2, *Atmos. Chem. Phys.*, 5, 2461-2474, 10.5194/acp-5-2461-2005, 2005.
- Streets, D. G., Bond, T. C., Carmichael, G. R., Fernandes, S. D., Fu, Q., He, D., Klimont, Z., Nelson, S. M., Tsai, N. Y., Wang, M. Q., Woo, J. H., and Yarber, K. F.: An inventory of gaseous and primary aerosol emissions in Asia in the year 2000, *Journal of Geophysical Research D: Atmospheres*, 108, GTE 30-31 - GTE 30-23, 2003.
- Sullivan, A. P., Holden, A. S., Patterson, L. A., McMeeking, G. R., Kreidenweis, S. M., Malm, W. C., Hao, W. M., Wold, C. E., and Collett, J. L.: A method for smoke marker measurements and its potential application for determining the contribution of biomass burning from wildfires and prescribed fires to ambient PM<sub>2.5</sub>organic carbon, *Journal of Geophysical Research*, 113, 10.1029/2008jd010216, 2008.
- Sun, Y. L., Wang, Z. F., Fu, P. Q., Yang, T., Jiang, Q., Dong, H. B., Li, J., and Jia, J. J.: Aerosol composition, sources and processes during wintertime in Beijing, China, *Atmos. Chem. Phys.*, 13, 4577-4592, 10.5194/acp-13-4577-2013, 2013.
- Tsai, Y. I., Sopajaree, K., Kuo, S.-C., and Yu, S.-P.: Potential PM<sub>2.5</sub> impacts of festival-related burning and other inputs on air quality in an urban area of southern Taiwan, *Science of The Total Environment*, 527-528, 65-79, <https://doi.org/10.1016/j.scitotenv.2015.04.021>, 2015.
- Tzompa-Sosa, Z. A., Sullivan, A. P., Retama, A., and Kreidenweis, S. M.: Contribution of Biomass Burning to Carbonaceous Aerosols in Mexico City during May 2013, *Aerosol and Air Quality Research*, 16, 114-124, 10.4209/aaqr.2015.01.0030, 2016.
- von Schneidmesser, E., Schauer, J. J., Hagler, G. S. W., and Bergin, M. H.: Concentrations and sources of carbonaceous aerosol in the atmosphere of Summit, Greenland, *Atmospheric Environment*, 43, 4155-4162, <https://doi.org/10.1016/j.atmosenv.2009.05.043>, 2009.
- Wang, G., Chen, C., Li, J., Zhou, B., Xie, M., Hu, S., Kawamura, K., and Chen, Y.: Molecular composition and size distribution of sugars, sugar-alcohols and carboxylic acids in airborne particles during a severe urban haze event caused by wheat straw burning, *Atmospheric Environment*, 45, 2473-2479, <https://doi.org/10.1016/j.atmosenv.2011.02.045>, 2011.
- Wang, J., Nie, W., Cheng, Y., Shen, Y., Chi, X., Wang, J., Huang, X., Xie, Y., Sun, P., Xu, Z., Qi, X., Su, H., and Ding, A.: Light absorption of brown carbon in eastern China based on 3-year multi-wavelength aerosol optical property observations at

- the SORPES station and an improved Absorption Ångström exponent segregation method, *Atmos. Chem. Phys. Discuss.*, 2018, 1-31, 10.5194/acp-2018-49, 2018a.
- Wang, Y., Ma, P.-L., Peng, J., Zhang, R., Jiang, J. H., Easter, R. C., and Yung, Y. L.: Constraining Aging Processes of Black Carbon in the Community Atmosphere Model Using Environmental Chamber Measurements, *Journal of Advances in Modeling Earth Systems*, 10, 2514-2526, 10.1029/2018MS001387, 2018b.
- 5 Washenfelter, R. A., Attwood, A. R., Brock, C. A., Guo, H., Xu, L., Weber, R. J., Ng, N. L., Allen, H. M., Ayres, B. R., Baumann, K., Cohen, R. C., Draper, D. C., Duffey, K. C., Edgerton, E., Fry, J. L., Hu, W. W., Jimenez, J. L., Palm, B. B., Romer, P., Stone, E. A., Wooldridge, P. J., and Brown, S. S.: Biomass burning dominates brown carbon absorption in the rural southeastern United States, *Geophysical Research Letters*, 42, 653-664, 10.1002/2014GL062444, 2015.
- 10 Yan, C., Zheng, M., Sullivan, A. P., Bosch, C., Desyaterik, Y., Andersson, A., Li, X., Guo, X., Zhou, T., Gustafsson, Ö., and Collett, J. L.: Chemical characteristics and light-absorbing property of water-soluble organic carbon in Beijing: Biomass burning contributions, *Atmospheric Environment*, 121, 4-12, 10.1016/j.atmosenv.2015.05.005, 2015.
- Yan, C., Zheng, M., Bosch, C., Andersson, A., Desyaterik, Y., Sullivan, A. P., Collett, J. L., Zhao, B., Wang, S., He, K., and Gustafsson, Ö.: Important fossil source contribution to brown carbon in Beijing during winter, *Scientific Reports*, 7, 43182, 10.1038/srep43182
- 15 <https://www.nature.com/articles/srep43182#supplementary-information>, 2017.
- Yang, L., Nguyen, D. M., Jia, S., REID, Jeffrey, S., YU, and Liya, E.: Impacts of biomass burning smoke on the distributions and concentrations of C2—C5 dicarboxylic acids and dicarboxylates in a tropical urban environment, *Atmospheric Environment*, 78, 211-218, 2013.
- 20 Yang, M., Howell, S. G., Zhuang, J., and Huebert, B. J.: Attribution of aerosol light absorption to black carbon, brown carbon, and dust in China – interpretations of atmospheric measurements during EAST-AIRE, *Atmos. Chem. Phys.*, 9, 2035-2050, 10.5194/acp-9-2035-2009, 2009.
- Zdráhal, Z., Oliveira, J., Vermeylen, R., Claeys, M., and Maenhaut, W.: Improved Method for Quantifying Levoglucosan and Related Monosaccharide Anhydrides in Atmospheric Aerosols and Application to Samples from Urban and Tropical
- 25 Locations, *Environmental Science & Technology*, 36, 747-753, 10.1021/es015619v, 2002.
- Zeng, T., and Wang, Y.: Nationwide summer peaks of OC/EC ratios in the contiguous United States, *Atmospheric Environment*, 45, 578-586, <https://doi.org/10.1016/j.atmosenv.2010.10.038>, 2011.
- Zhang, L., Liu, Y., and Hao, L.: Contributions of open crop straw burning emissions to PM<sub>2.5</sub> concentrations in China, *Environmental Research Letters*, 11, 014014, 10.1088/1748-9326/11/1/014014, 2016.
- 30 Zhang, T., Claeys, M., Cachier, H., Dong, S., Wang, W., Maenhaut, W., and Liu, X.: Identification and estimation of the biomass burning contribution to Beijing aerosol using levoglucosan as a molecular marker, *Atmospheric Environment*, 42, 7013-7021, <https://doi.org/10.1016/j.atmosenv.2008.04.050>, 2008a.
- Zhang, T., Wooster, M. J., Green, D. C., and Main, B.: New field-based agricultural biomass burning trace gas, PM<sub>2.5</sub>, and black carbon emission ratios and factors measured in situ at crop residue fires in Eastern China, *Atmospheric Environment*, 121, 22-34, <https://doi.org/10.1016/j.atmosenv.2015.05.010>, 2015.
- 35 Zhang, X., Lin, Y.-H., Surratt, J. D., and Weber, R. J.: Sources, Composition and Absorption Ångström Exponent of Light-absorbing Organic Components in Aerosol Extracts from the Los Angeles Basin, *Environmental Science & Technology*, 47, 3685-3693, 10.1021/es305047b, 2013.
- Zhang, Y., Schauer, J. J., Zhang, Y., Zeng, L., Wei, Y., Liu, Y., and Shao, M.: Characteristics of Particulate Carbon Emissions from Real-World Chinese Coal Combustion, *Environmental Science & Technology*, 42, 5068-5073, 10.1021/es7022576, 2008b.
- 40 Zhang, Y., Forrister, H., Liu, J., Dibb, J., Anderson, B., Schwarz, J. P., Perring, A. E., Jimenez, J. L., Campuzano-Jost, P., Wang, Y., Nenes, A., and Weber, R. J.: Top-of-atmosphere radiative forcing affected by brown carbon in the upper troposphere, *Nature Geoscience*, 10, 486-489, 10.1038/ngeo2960, 2017.
- 45 Zhang, Y.-N., Zhang, Z.-S., Chan, C.-Y., Engling, G., Sang, X.-F., Shi, S., and Wang, X.-M.: Levoglucosan and carbonaceous species in the background aerosol of coastal southeast China: case study on transport of biomass burning smoke from the Philippines, *Environmental Science and Pollution Research*, 19, 244-255, 10.1007/s11356-011-0548-7, 2012.
- Zhang, Y.-x., Shao, M., Zhang, Y.-h., Zeng, L.-m., He, L.-y., Zhu, B., Wei, Y.-j., and Zhu, X.-l.: Source profiles of particulate organic matters emitted from cereal straw burnings, *Journal of Environmental Sciences*, 19, 167-175, [https://doi.org/10.1016/S1001-0742\(07\)60027-8](https://doi.org/10.1016/S1001-0742(07)60027-8), 2007.
- 50

Zhang, Z., Engling, G., Lin, C.-Y., Chou, C. C. K., Lung, S.-C. C., Chang, S.-Y., Fan, S., Chan, C.-Y., and Zhang, Y.-H.: Chemical speciation, transport and contribution of biomass burning smoke to ambient aerosol in Guangzhou, a mega city of China, *Atmospheric Environment*, 44, 3187-3195, <https://doi.org/10.1016/j.atmosenv.2010.05.024>, 2010.

5 Zhou, Y., Xing, X., Lang, J., Chen, D., Cheng, S., Wei, L., Wei, X., and Liu, C.: A comprehensive biomass burning emission inventory with high spatial and temporal resolution in China, *Atmospheric Chemistry and Physics*, 17, 2839-2864, 10.5194/acp-17-2839-2017, 2017.

Zhu, J., Xia, X., Che, H., Wang, J., Zhang, J., and Duan, Y.: Study of aerosol optical properties at Kunming in southwest China and long-range transport of biomass burning aerosols from North Burma, *Atmospheric Research*, 169, 237-247, <https://doi.org/10.1016/j.atmosres.2015.10.012>, 2016.

10

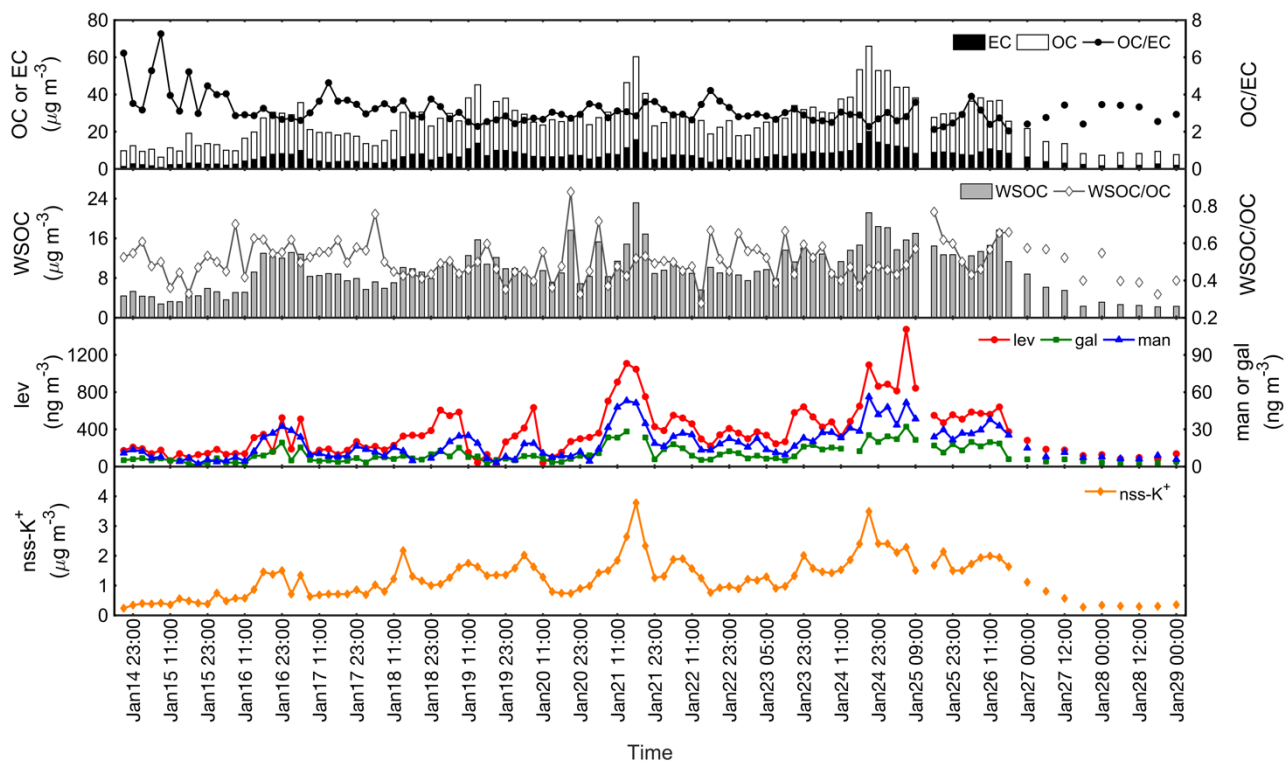

**Figure 1: Time series of OC, EC, WSOC, levoglucosan (lev), mannosan (man), galactosan (gal) and non-sea-salt potassium (nss-K<sup>+</sup>) concentration and OC/EC, WSOC/OC ratio for PM<sub>2.5</sub> samples. The horizontal ordinate indicates ending time for each sample.**



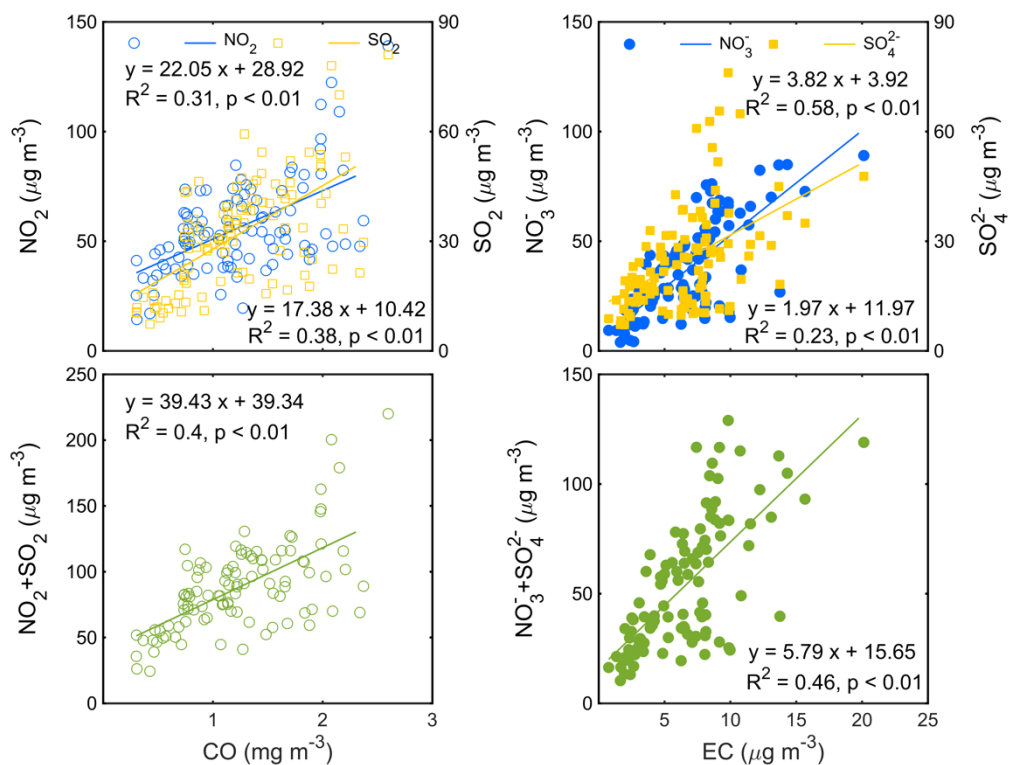

**Figure 2: Correlations of carbon monoxide (CO) with nitrogen dioxide (NO<sub>2</sub>), sulfur dioxide (SO<sub>2</sub>) and sum of nitrogen dioxide and sulfate dioxide (NO<sub>2</sub> + SO<sub>2</sub>) in ambient air, and correlations of EC with nitrate (NO<sub>3</sub><sup>-</sup>), sulfate (SO<sub>4</sub><sup>2-</sup>) and sum of nitrate and sulfate (NO<sub>3</sub><sup>-</sup> + SO<sub>4</sub><sup>2-</sup>) in PM<sub>2.5</sub> from 14 to 29 Jan, 2015 in Nanjing.**

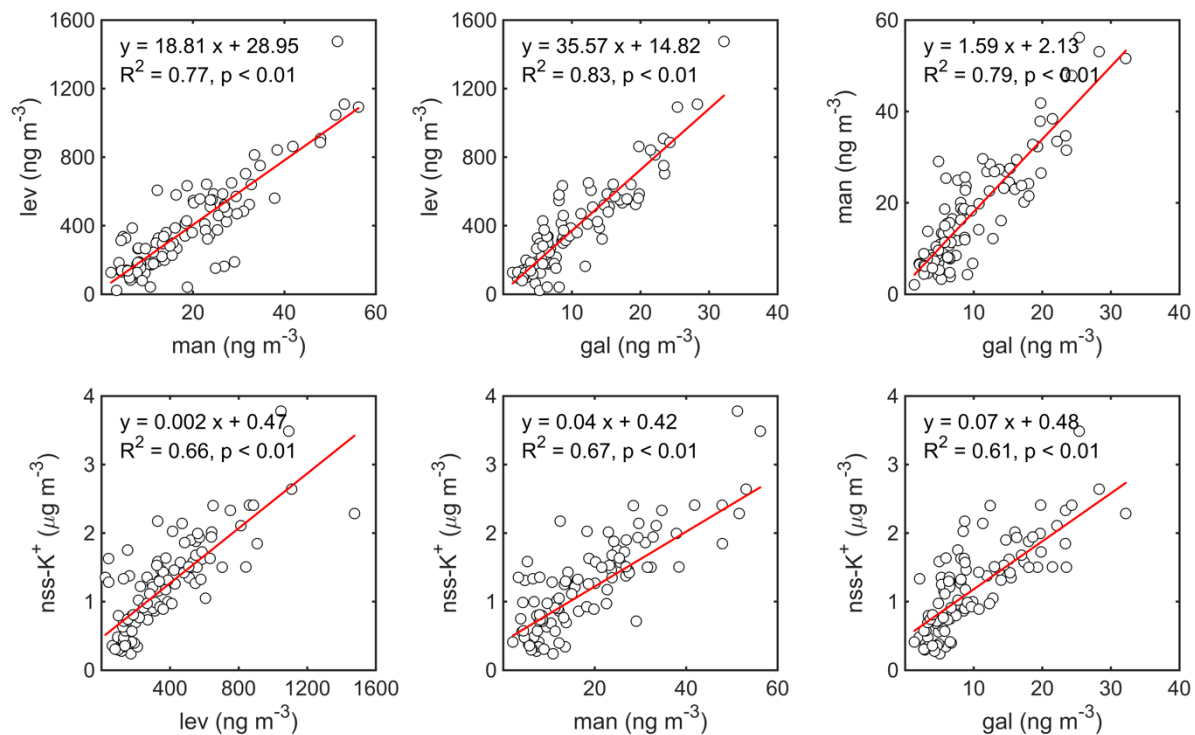

**Figure 3: Correlations between 4 tracers of biomass burning including levoglucosan (lev), mannosan (man), galactosan (gal) and non-sea-salt potassium (nss-K<sup>+</sup>) in PM<sub>2.5</sub> from 14 to 29 Jan, 2015 in Nanjing.**

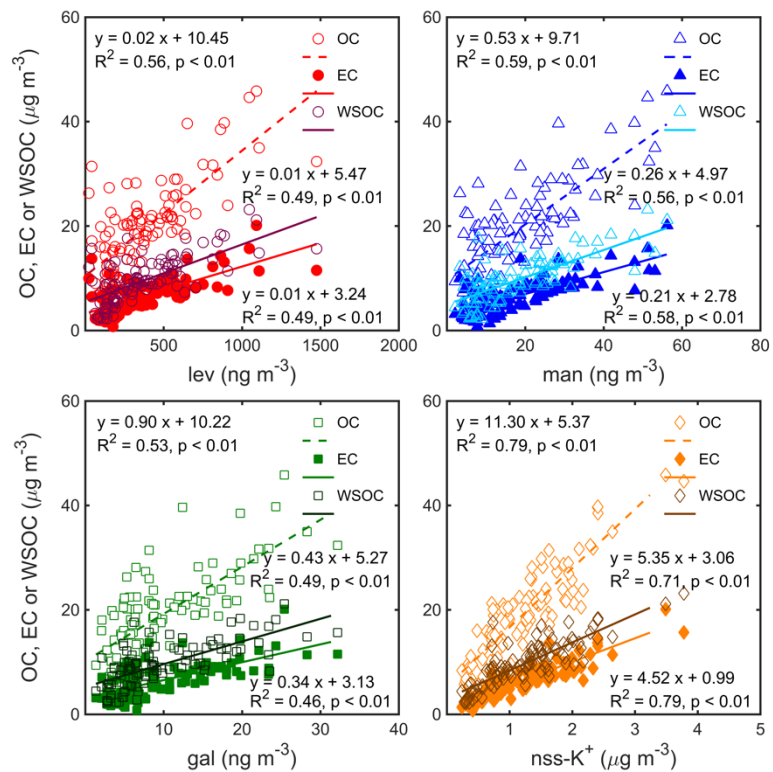

**Figure 4: Correlations of OC, EC and WSOC vs levoglucosan (lev), mannosan (man), galactosan (gal) and non-sea-salt potassium (nss- $\text{K}^+$ ) in  $\text{PM}_{2.5}$  from 14 to 29 Jan, 2015 in Nanjing.**

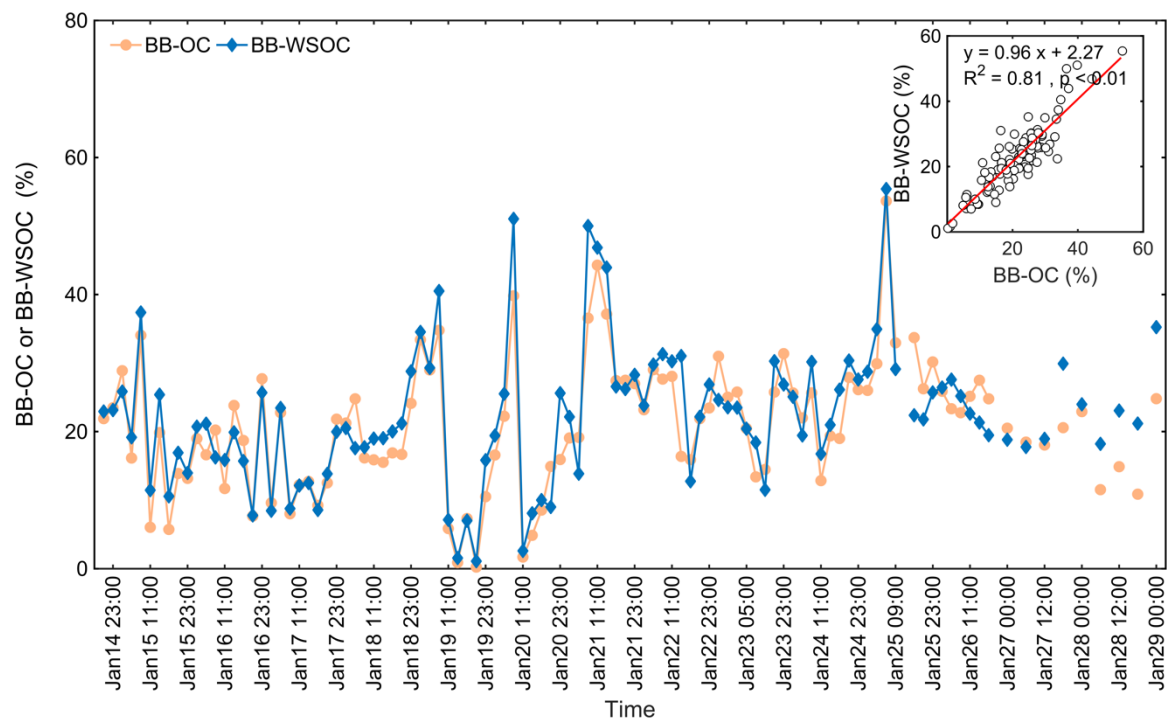

**Figure 5: Time series of biomass burning contribution to OC (BB-OC) and WSOC(BB-WSOC).**

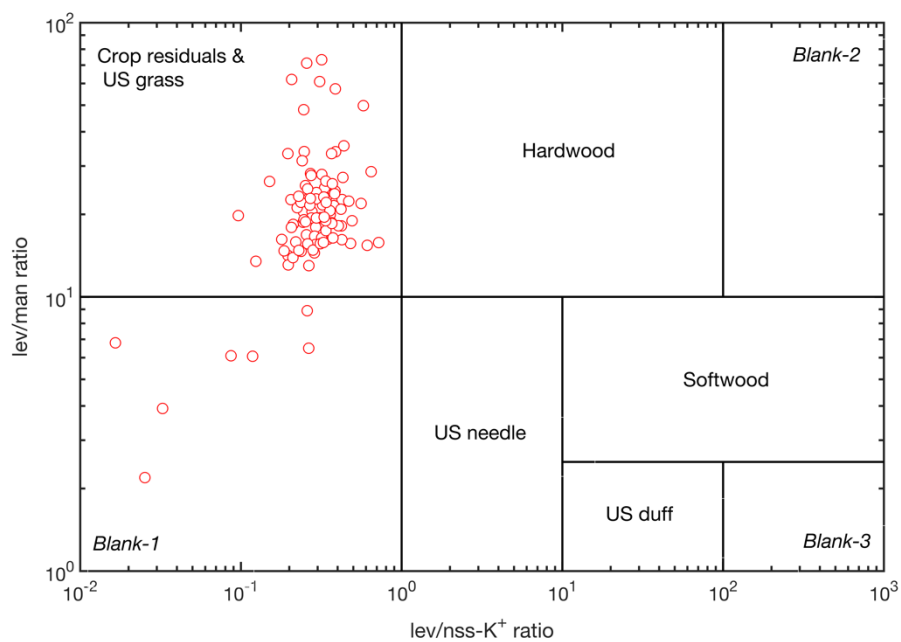

**Figure 6: Representative ranges of lev/nss- $K^+$  and lev/man ratios for different types of biomass fuel introduced by Cheng et al. (2013). Results from the ambient samples collected in this study are also shown for comparison.**

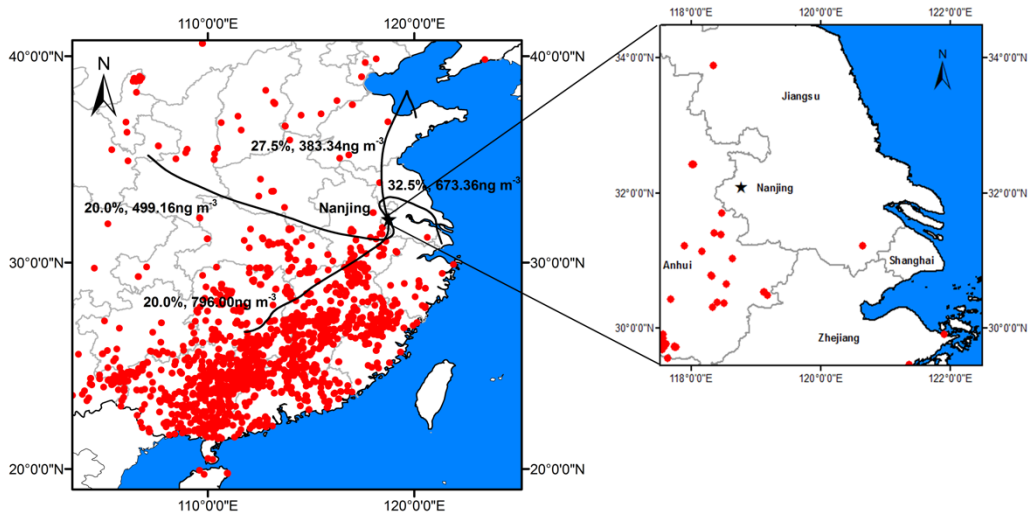

**Figure 7: Air mass backward trajectory from 21 to 25 Jan, along with the MODIS fire spot map. Percentage refers to the air mass contribution to Nanjing and values with a unit of  $\text{ng m}^{-3}$  refers to mean concentration of levoglucosan for every trajectory in that cluster.**

Four-day PES of BC at NUPT in Jan 25 05:00 - 08:00 (LT), 2015

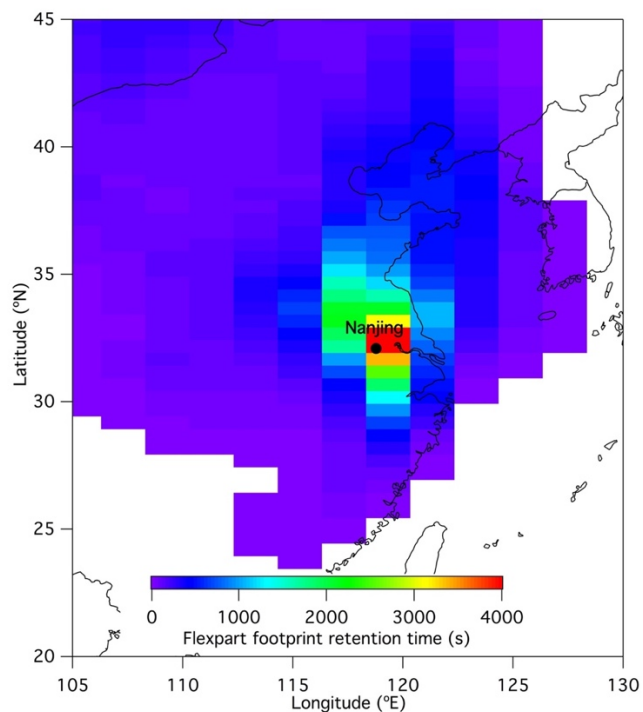

**Figure 8: The four-day footprint of NUPT (118.78° E, 32.09° N, black point), the observation site, starting from 25 Jan, 05:00-08:00 LT when the maximum levoglucosan was observed. The footprint was illustrated as FLEXPART potential emission sensitivity shown as the retention time in each grid at 0–500 m contributing to the observed elemental carbon.**

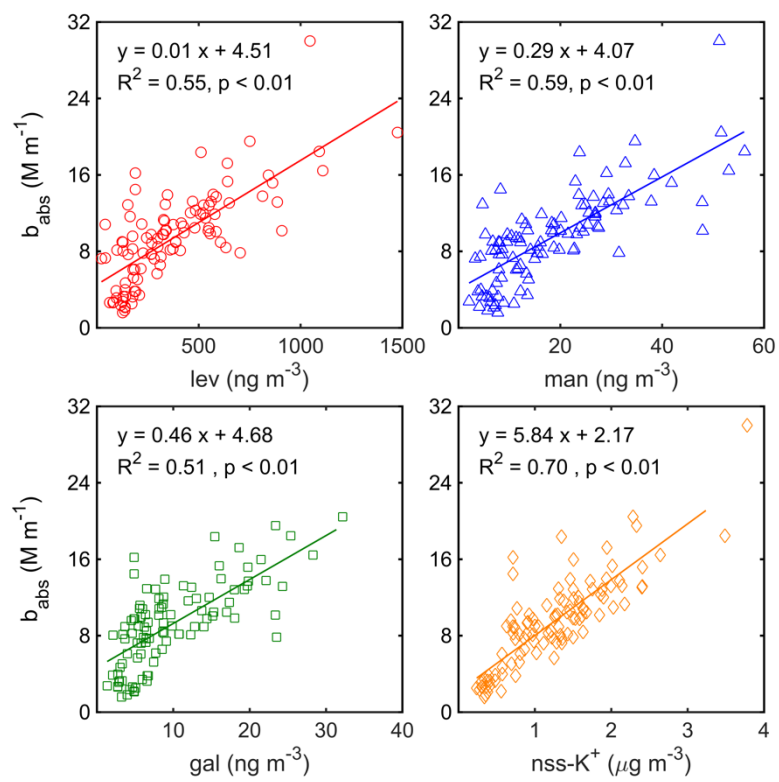

**Figure 9: Correlations of water-soluble BrC carbon absorption coefficient ( $b_{\text{abs}}$ ) vs levoglucosan (lev), mannosan (man), galactosan (gal) and non-sea-salt potassium (nss- $\text{K}^+$ ) in  $\text{PM}_{2.5}$  from 14 to 29 Jan, 2015 in Nanjing.**



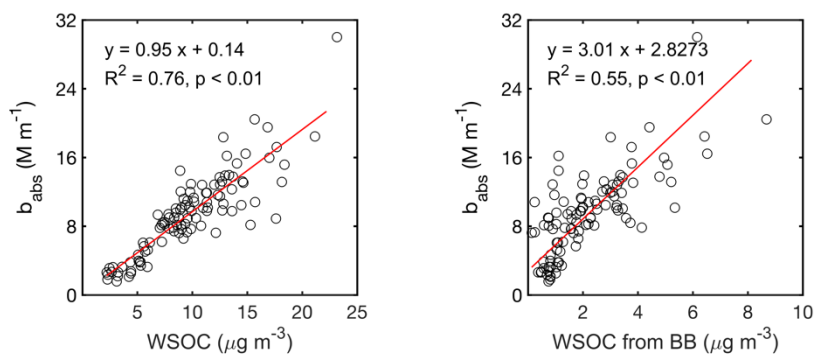

**Figure 10: Correlations of water-soluble BrC absorption coefficient ( $b_{abs}$ ) and WSOC or WSOC from biomass burning (WSOC from BB) in  $PM_{2.5}$  from 14 to 29 Jan, 2015 in Nanjing. WSOC from BB is calculated with WSOC multiplied by BB-WSOC.**

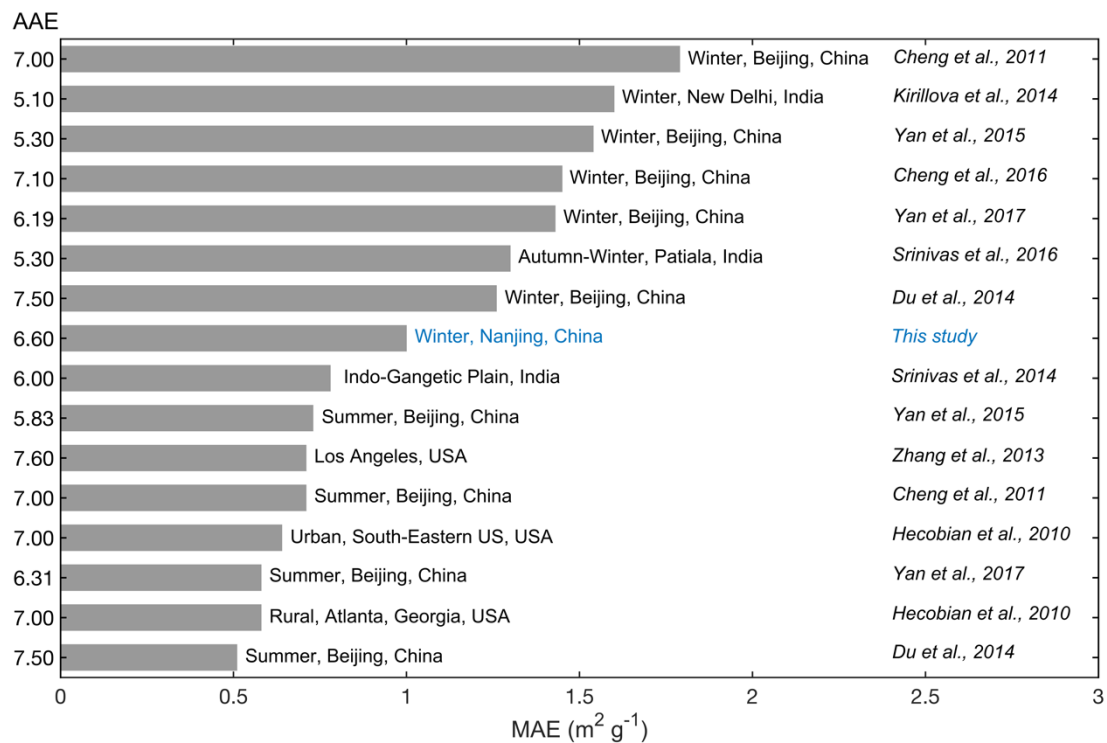

**Figure 11: Comparison of mean mass absorbance efficiency (MAE) and absorption Angstrom exponent (AAE) of WSOC in PM<sub>2.5</sub> in this study with those reported in the literature.**

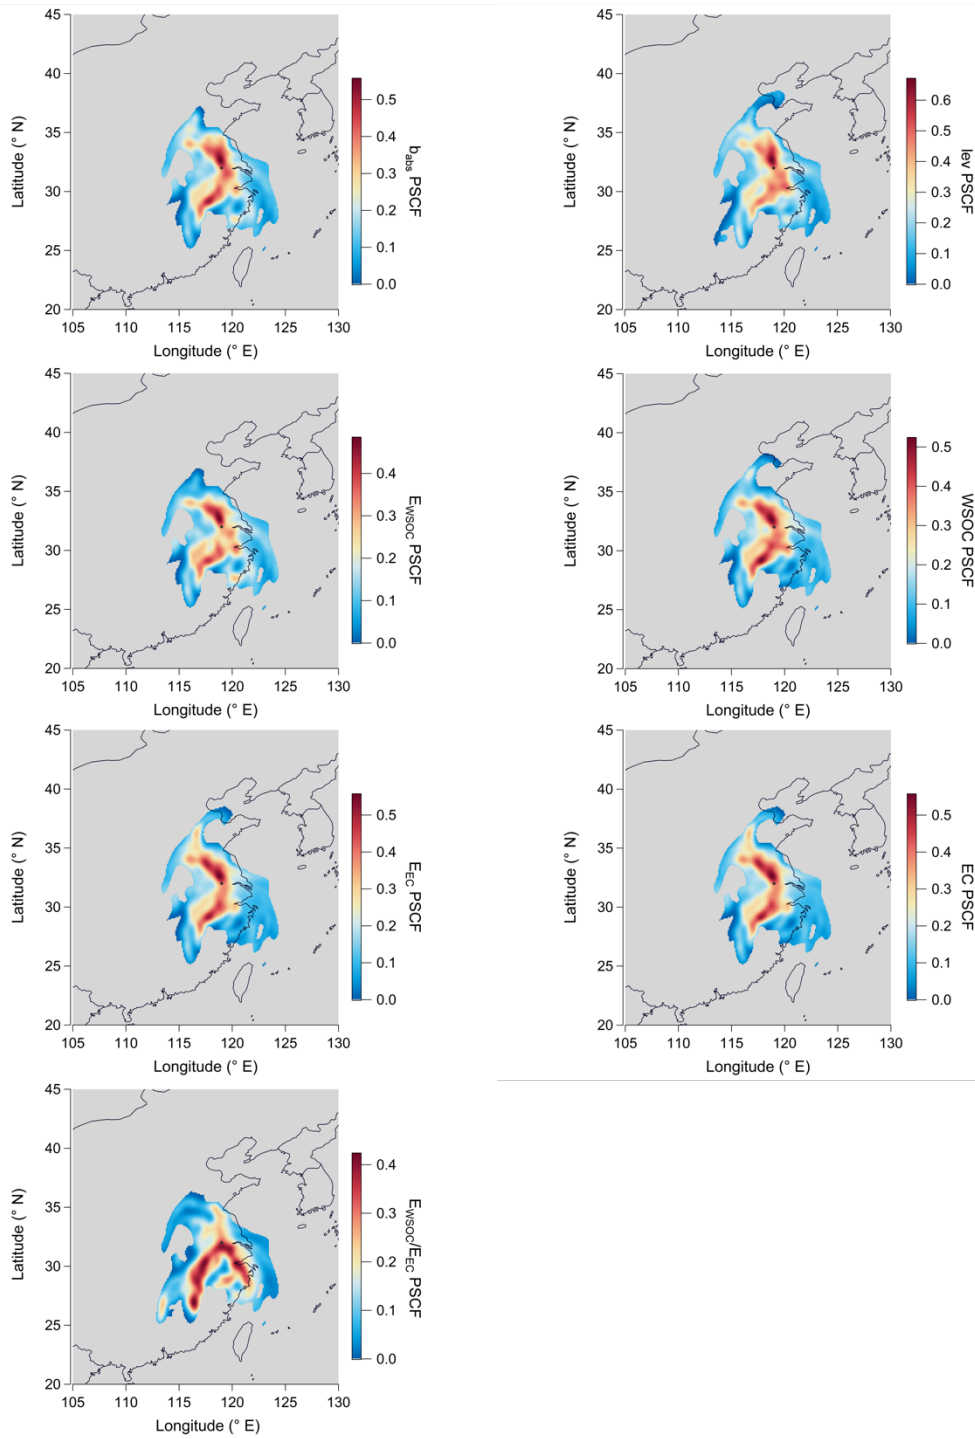

**Figure 12: The PSCF map for levoglucosan (lev), water-soluble BrC absorption coefficient ( $b_{abs}$ ), WSOC, EC, light-absorption of WSOC ( $E_{wsoc}$ ), and EC ( $E_{ec}$ ), WSOC to EC light-absorption ratio ( $E_{wsoc}/E_{ec}$ ) for PM<sub>2.5</sub> from 14 to 29 Jan, 2015 in Nanjing (black point).**

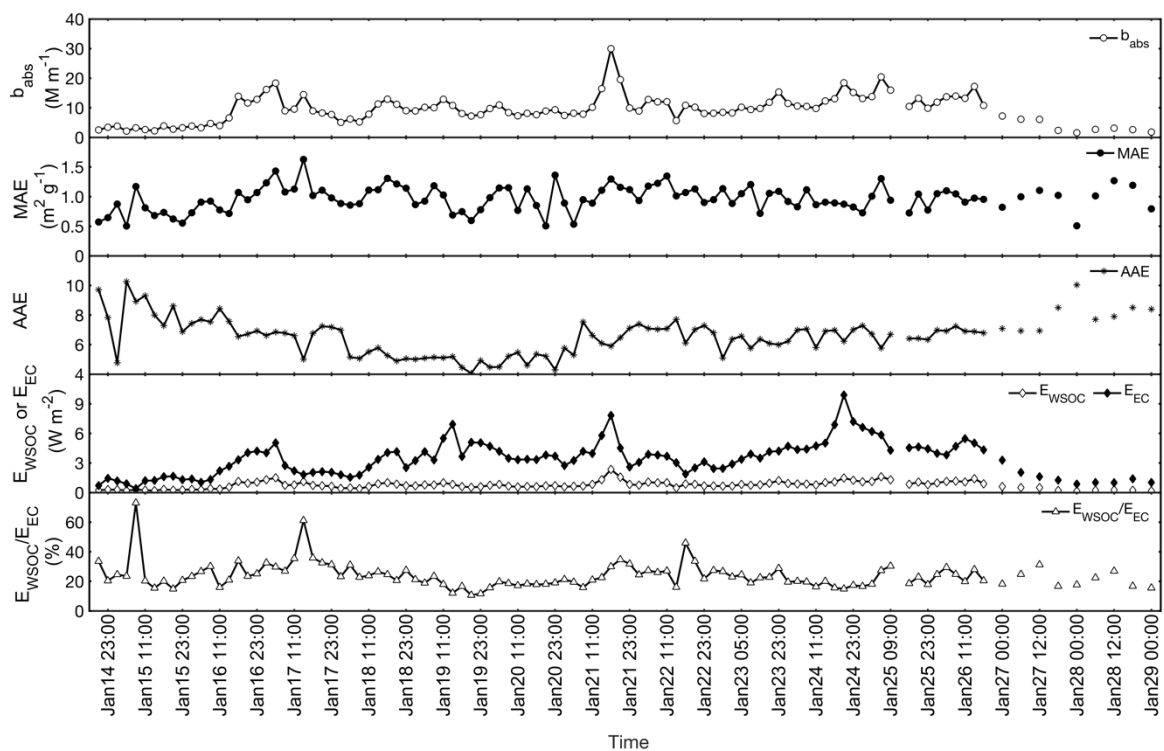

**Figure 13: Time series of water-soluble BrC absorption coefficient ( $b_{abs}$ ), mass absorbance efficiency (MAE), absorption Angstrom exponent (AAE), light-absorption of WSOC ( $E_{wsoc}$ ) and EC ( $E_{ec}$ ), WSOC to EC light-absorption ratio ( $E_{wsoc}/E_{ec}$ ) for PM<sub>2.5</sub> from 14 to 29 Jan, 2015 in Nanjing.**

**Table 1. Concentration and mass ratio of atmospheric gaseous components and particulate species (PM<sub>2.5</sub>), biomass burning contribution to carbonaceous aerosol, light-absorption parameters of water-soluble BrC and solar energy absorption of carbonaceous aerosols.**

|                                    |                                | MEAN | STD  | MIN  | MAX   |
|------------------------------------|--------------------------------|------|------|------|-------|
| CO                                 | mg m <sup>-3</sup>             | 1.2  | 0.5  | 0.3  | 2.6   |
| NO <sub>2</sub>                    | µg m <sup>-3</sup>             | 56.1 | 21.0 | 14.3 | 139.0 |
| SO <sub>2</sub>                    | µg m <sup>-3</sup>             | 31.8 | 15.1 | 7.3  | 81.0  |
| OC                                 | µg m <sup>-3</sup>             | 19.4 | 8.6  | 5.5  | 45.8  |
| EC                                 | µg m <sup>-3</sup>             | 6.6  | 3.5  | 0.8  | 20.1  |
| WSOC                               | µg m <sup>-3</sup>             | 9.7  | 4.3  | 2.2  | 23.2  |
| OC/EC                              |                                | 3.2  | 0.8  | 2.0  | 7.3   |
| WSOC/OC                            |                                | 0.5  | 0.1  | 0.3  | 0.9   |
| NO <sub>3</sub> <sup>-</sup>       | µg m <sup>-3</sup>             | 29.3 | 17.4 | 3.1  | 71.2  |
| SO <sub>4</sub> <sup>2-</sup>      | µg m <sup>-3</sup>             | 24.8 | 14.1 | 7.1  | 76.1  |
| nss-K <sup>+</sup>                 | µg m <sup>-3</sup>             | 1.2  | 0.7  | 0.2  | 3.8   |
| levoglucosan                       | ng m <sup>-3</sup>             | 373  | 268  | 22.4 | 1476  |
| mannan                             | ng m <sup>-3</sup>             | 18.5 | 12.5 | 2.1  | 56.2  |
| galactosan                         | ng m <sup>-3</sup>             | 9.9  | 6.7  | 1.4  | 32.2  |
| BB-OC                              | %                              | 20.9 | 9.3  | 0.2  | 53.6  |
| BB-WSOC                            | %                              | 22.3 | 9.9  | 1.1  | 55.4  |
| lev/man                            |                                | 22.5 | 12.3 | 2.2  | 73.2  |
| lev/nss-K <sup>+</sup>             |                                | 0.3  | 0.1  | 0.0  | 0.7   |
| b <sub>abs</sub>                   | M m <sup>-1</sup>              | 9.4  | 4.8  | 1.6  | 30.0  |
| MAE                                | m <sup>2</sup> g <sup>-1</sup> | 1.0  | 0.2  | 0.5  | 1.6   |
| AAE                                |                                | 6.6  | 1.3  | 4.1  | 10.3  |
| E <sub>WSOC</sub>                  | W m <sup>-2</sup>              | 0.8  | 0.4  | 0.2  | 2.3   |
| E <sub>EC</sub>                    | W m <sup>-2</sup>              | 3.4  | 1.7  | 0.4  | 9.9   |
| E <sub>WSOC_BB</sub>               | W m <sup>-2</sup>              | 0.2  | 0.1  | 0.0  | 0.9   |
| E <sub>WSOC</sub> /E <sub>EC</sub> | %                              | 23.8 | 8.7  | 10.6 | 73.0  |
| E* <sub>WSOC</sub>                 | W m <sup>-2</sup>              | 1.2  | 0.5  | 0.3  | 1.9   |
| E* <sub>EC</sub>                   | W m <sup>-2</sup>              | 4.2  | 2.0  | 1.5  | 7.8   |

\* refers to values derived from RRTMG\_SW model simulation.

**Table 2. Comparison of levoglucosan concentration level in PM<sub>2.5</sub> during this study with those reported in the literature.**

| Sampling Site                  | Site Type | Sampling Time    | Concentration Range<br>(ng m <sup>-3</sup> ) | Reference                        |
|--------------------------------|-----------|------------------|----------------------------------------------|----------------------------------|
| Azores, Portugal               | coastal   | Winter           | 6.6                                          | (Puxbaum et al., 2007)           |
| Puy de Dôme, France            | coastal   | Winter           | 18.3                                         |                                  |
| Schauinsland, Germany          | coastal   | Winter           | 33.7                                         |                                  |
| Sonnblick, Austria             | coastal   | Winter           | 12.4                                         |                                  |
| Summit, Greenland              | coastal   | May-December     | 0.3                                          | (von Schneidmesser et al., 2009) |
| Jilin, China                   | forest    | July             | 42 (32-67)                                   | (Wang et al., 2008)              |
| Shanghai, China                | forest    | June             | 143 (20-212)                                 |                                  |
| Guangdong, China               | forest    | August           | 25 (0.3-61)                                  |                                  |
| Hainan, China                  | forest    | November         | 107 (19-398)                                 |                                  |
| Izana, Sahara                  | forest    | August           | 0.5                                          | (García et al., 2017)            |
| Ovens, Australia               | rural     | Autumn           | 870                                          | (Reisen et al., 2011)            |
| Manjimup, Australia            | rural     | Autumn           | 1060                                         |                                  |
| Langley, Canada                | rural     | August           | 26                                           | (Leithead et al., 2006)          |
| Hok Tusi, Hong Kong            | rural     | Spring           | 30                                           | (Sang et al., 2011)              |
| Kowloon, Hong Kong             | urban     | Spring           | 36                                           |                                  |
| National University, Singapore | urban     | September        | 91.2                                         | (Yang et al., 2013)              |
| Grenoble, France               | urban     | January          | 815                                          | (Favez et al., 2010)             |
| Beijing, China                 | urban     | Summer           | 230                                          | (Cheng et al., 2013)             |
|                                |           | BB episode       | 750                                          |                                  |
|                                |           | Typical summer   | 120                                          |                                  |
|                                |           | Winter           | 590                                          |                                  |
|                                |           | Firework episode | 460                                          |                                  |
|                                |           | Typical winter   | 640                                          |                                  |
| Shanghai, China                | urban     | Spring           | 66 (18-159)                                  | (Li et al., 2016c)               |
|                                |           | Summer           | 28 (8.6-194)                                 |                                  |
|                                |           | Autumn           | 229 (13-1606)                                |                                  |
|                                |           | Winter           | 161 (26-614)                                 |                                  |
| Nanjing, China                 | urban     | Winter           | 373 (22.4-1476)                              | Current study                    |

**Table 3. Optics for EC and WSOC (RH=0.7) in the shortwave band 26 (22650-29000 cm<sup>-1</sup>, 345-442 nm) provided in RRTMG\_SW.**

|               | MAE* (m <sup>2</sup> g <sup>-1</sup> ) | SSA* | g*   |
|---------------|----------------------------------------|------|------|
| EC            | 10.75                                  | 0.27 | 0.40 |
| WSOC (RH=0.7) | 2.44                                   | 0.66 | 0.71 |
